# Supplementary material for: Phenylene as an efficient mediator for intermetallic electronic coupling
Source: Royal Society of Chemistry journal article supplement (doi:10.1039/d2cc00949h), 2022-01-01
Supplement: d2cc00949h1.pdf [file d2cc00949h1.pdf]

**Supplementary Information for**

Phenylene as An Efficient Mediator for Intermetallic Electronic Coupling

Lyndsy A. Miller-Clark, Adharsh Raghavan, Reese A. Clendening and Tong Ren\*

---

\* To whom correspondence should be addressed. Email: [tren@purdue.edu](mailto:tren@purdue.edu).

*Department of Chemistry, Purdue University, West Lafayette, Indiana 47907*

## Table of Contents

|                                                                                                                                                |     |
|------------------------------------------------------------------------------------------------------------------------------------------------|-----|
| 1. Synthetic details of <b>1</b> , <b>2</b> and <b>3</b> .....                                                                                 | S4  |
| a. <b>Figs. S1–S3</b> ESI-MS spectra of <b>1–3</b> .....                                                                                       | S7  |
| 2. X-ray structural analysis .....                                                                                                             | S9  |
| a. <b>Fig. S4</b> ORTEP plot of <b>3</b> .....                                                                                                 | S10 |
| b. <b>Table S1</b> Full list of bond lengths for <b>3</b> .....                                                                                | S11 |
| c. <b>Table S2</b> Full list of bond lengths for <b>2</b> .....                                                                                | S14 |
| d. <b>Table S3</b> Crystallographic data for <b>2</b> and <b>3</b> .....                                                                       | S19 |
| 3. Electrochemistry details.....                                                                                                               | S20 |
| a. <b>Fig. S5</b> Voltammetric study (vs $\text{Fc}^{+/0}$ ) of <b>1</b> .....                                                                 | S20 |
| b. <b>Table S4</b> Electrochemical data (vs $\text{Ag}/\text{AgCl}$ ) from CV of <b>1–3</b> .....                                              | S20 |
| c. <b>Table S5</b> Electrochemical data (vs $\text{Fc}^{+/0}$ ) from CV of <b>1</b> and <b>2</b> .....                                         | S21 |
| d. <b>Table S6</b> Comparison of <b>2</b> vs $[\text{Ru}_2(\text{ap})_4](\mu\text{-(C}\equiv\text{C)}_n)$ ( $n = 1,2$ ).....                   | S21 |
| 4. Absorption details.....                                                                                                                     | S22 |
| a. <b>Fig. S6</b> Absorption spectra overlay of <b>1–3</b> in THF .....                                                                        | S22 |
| 5. Spectroelectrochemical UV-Vis-NIR spectra of <b>2</b> .....                                                                                 | S23 |
| a. <b>Fig. S7</b> Full reduction spectra.....                                                                                                  | S23 |
| b. <b>Fig. S8</b> Gaussian deconvolution of $[\mathbf{2}]^+$ with IR data.....                                                                 | S24 |
| c. <b>Fig. S9</b> Gaussian deconvolution of $[\mathbf{2}]^+$ without IR data.....                                                              | S25 |
| d. <b>Fig. S10</b> Gaussian deconvolution of $[\mathbf{2}]^{2+}$ with IR data .....                                                            | S26 |
| e. <b>Fig. S11</b> Gaussian deconvolution of $[\mathbf{3}]^+$ .....                                                                            | S27 |
| f. <b>IVCT Band Analysis</b> .....                                                                                                             | S28 |
| 6. Spectroelectrochemical IR $\bar{\nu}$ ( $\text{C}\equiv\text{N}$ ) changes of <b>2</b> .....                                                | S29 |
| a. <b>Fig. S12</b> Uncorrected full oxidation spectra of $[\mathbf{2}]^+$ .....                                                                | S29 |
| b. <b>Fig. S13</b> Oxidation spectra .....                                                                                                     | S30 |
| b. <b>Fig. S14</b> Reduction spectra.....                                                                                                      | S31 |
| c. <b>Table S7</b> $\bar{\nu}$ ( $\text{C}\equiv\text{N}$ ) of $[\mathbf{2}]^n/[\mathbf{2}]^{n+}$ ( $n = 1,2$ ) and $[\mathbf{3}]^{+/-}$ ..... | S31 |
| 7. Spectroelectrochemical UV-Vis-NIR spectra of <b>3</b> .....                                                                                 | S32 |
| a. <b>Fig. S15</b> Reduction spectra .....                                                                                                     | S32 |
| 8. Spectroelectrochemical IR changes of <b>3</b> .....                                                                                         | S33 |

|                                                                                                     |     |
|-----------------------------------------------------------------------------------------------------|-----|
| a. <b>Fig. S16</b> Oxidation spectra .....                                                          | S33 |
| b. <b>Fig. S17</b> Reduction spectra.....                                                           | S33 |
| 9. $^1\text{H}$ NMR Spectra.....                                                                    | S34 |
| a. <b>Fig. S18</b> Spectrum of <b>2</b> .....                                                       | S34 |
| b. <b>Fig. S19</b> Spectrum of <b>3</b> .....                                                       | S35 |
| 10. Room Temperature Magnetism measurements of <b>1–3</b> .....                                     | S36 |
| a. <b>Table S8</b> Evans Method data.....                                                           | S36 |
| b. <b>Table S9</b> Avg. Guoy Balance data of <b>3</b> .....                                         | S36 |
| 11. Calculation details .....                                                                       | S37 |
| a. <b>Table S10</b> Calculated vs experimental bond lengths of <b>2</b> .....                       | S38 |
| b. <b>Fig. S20</b> Frontier $\alpha$ -spin molecular orbitals of <b>2</b> .....                     | S39 |
| c. <b>Table S11</b> Selected molecular orbitals of <b>2</b> (S = 0 state) .....                     | S40 |
| d. <b>Table S12</b> Frontier molecular orbitals for <b>2</b> with orbital compositions.....         | S42 |
| e. <b>Table S13</b> Selected frontier molecular orbitals and % orbital contributions .....          | S43 |
| f. <b>Table S14</b> Calculated vs experimental bond lengths of <b>3</b> .....                       | S44 |
| g. <b>Table S15</b> Selected bond metrics for the DFT-optimized structure of $[\mathbf{2}]^+$ ..... | S44 |
| h. <b>Fig. S21</b> Natural Transition Orbitals for $[\mathbf{2}]^+$ .....                           | S45 |
| i. <b>Fig. S22</b> TD-DFT calculated electronic absorption spectrum of $[\mathbf{2}]^+$ .....       | S45 |
| j. <b>Table S16</b> xyz coordinates for <b>2</b> (S=0, B97D3).....                                  | S46 |
| k. <b>Table S17</b> xyz coordinates for <b>2</b> (S=1, B97D3).....                                  | S49 |
| l. <b>Table S18</b> xyz coordinates for <b>3</b> (S=0, B97D3).....                                  | S52 |
| m. <b>Table S19</b> xyz coordinates for <b>3</b> (S=1, B97D3).....                                  | S54 |
| n. <b>Table S20</b> xyz coordinates for $[\mathbf{2}]^+$ (S=1/2, B97D3) .....                       | S56 |
| 12. References.....                                                                                 | S59 |

## 1. Experimental details

**Materials and instruments.**  $\text{Ru}_2(\text{ap})_4\text{Cl}$ ,<sup>1</sup>  $\text{Ru}_2(\text{ap})_4(\text{C}_6\text{H}_5)_2$  and  $(\text{NC})(\text{Ru}_2(\text{ap})_4(\text{C}_6\text{H}_5))$  (**3**)<sup>3</sup> were prepared according to literature methods. Tetrahydrofuran (THF) was distilled over Na/benzophenone under a  $\text{N}_2$  atmosphere.  $\text{Et}_2\text{O}$  was dried and deoxygenated using literature procedures with a Seca solvent purification system.<sup>4</sup>  $[\text{Bu}_4\text{N}][\text{CN}]$ ,  $[\text{Bu}_4\text{N}][\text{PF}_6]$  and  $n\text{BuLi}$  were purchased from Sigma Aldrich and 1,4-diodobenzene was purchased from Acros Organics. All reactions were performed under dry  $\text{N}_2$  atmosphere using standard Schlenk techniques where noted. UV-Vis-NIR spectra were obtained with a JASCO V-670 spectrophotometer in THF solutions. Infrared spectra were obtained on a JASCO FT-IR 6300 spectrometer equipped with an attenuated total reflectance (ATR) accessory on a diamond crystal. ESI-MS were analyzed on an Advion Mass Spectrometer.  $^1\text{H}$  NMR spectra were recorded on a Varian Inova 300 spectrometer operating at 300 MHz. Magnetic susceptibility measurements of **3** were taken using a Johnson Matthey Mark-I magnetic susceptibility balance. The room temperature magnetic moments for **1**, **2** and **3** were determined using the Evans method<sup>5</sup> with chemical shifts of ferrocene as the reference. Elemental analyses were performed by Atlantic Microlab, Inc. Cyclic voltammograms were recorded in 0.1 M  $[\text{Bu}_4\text{N}][\text{PF}_6]$  and 1.0 mM analyte solution (THF, Ar degassed) using a CHI620A voltammetric analyzer with a glassy carbon working electrode (diameter = 2 mm), Pt-wire counter electrode, and an Ag/AgCl reference electrode with ferrocene used as an external reference. Spectroelectrochemical absorption data was taken with a JASCO V-670 spectrophotometer, and IR data was taken on a JASCO FT-IR 6300 spectrometer. Spectroelectrochemical analysis was performed using an optically transparent thin-layer electrochemistry (OTTLE) liquid-sample cell<sup>6</sup> with a 0.2 mm optical path length, 0.3 mL sample volume, and a  $\text{CaF}_2$  window. The cell was equipped with a mesh Pt working electrode, mesh Pt

auxiliary electrode, and Ag reference electrode; the analyte concentration was 2.0 mM in 4 mL dry THF at a 0.1 M [<sup>n</sup>Bu<sub>4</sub>N][PF<sub>6</sub>] electrolyte concentration. X-ray diffraction (XRD) data (Table S3) for **2** was obtained on a Bruker Quest diffractometer with Cu Kα radiation (λ = 1.54178 Å) at 150 K. XRD data (Table S3) for **3** was obtained on a Bruker Quest diffractometer with Mo Kα radiation (λ = 0.71073 Å) at 150 K.

**[Ru<sub>2</sub>(ap)<sub>4</sub>]<sub>2</sub>(μ-1,4-C<sub>6</sub>H<sub>4</sub>) (1)**. 1,4-Diiodobenzene (0.157 g, 0.475 mmol) was dissolved in 10.0 mL Et<sub>2</sub>O and was treated with 0.6 mL <sup>n</sup>BuLi (1.5 mmol) at -78°C for 1 hour. Three half-equivalents (0.6 mL) of the aryllithium solution were added to a 15.0 mL solution of Ru<sub>2</sub>(ap)<sub>4</sub>Cl in THF (100 mg, 0.109 mmol) every hour. This reaction stirred overnight. The Et<sub>2</sub>O was then removed and the green-brown solid resuspended in hexanes. The suspension was filtered and the dark solid washed with copious amounts of hexanes and pentane until the wash became colorless (ca. 75 mL total). The solid was then washed with 2 x 10 mL cold MeOH and the final wash with 2 x 10 mL 1:1 Et<sub>2</sub>O/pentane. The brown solid was dried and either used immediately to make **2** or for characterization. Yield: 62.3 mg, 62%. Data for **1** are as follows. ESI-MS (*m/z*, based on <sup>101</sup>Ru): [M]<sup>2+</sup> = 917.6. UV-Vis (in THF) λ / nm (ε / M<sup>-1</sup> cm<sup>-1</sup>): 461 (9200), (sh)567 (4900), 761 (5900). μ<sub>eff</sub> (22°C) (Evans method) = 5.82 μ<sub>B</sub>. Electrochemistry (THF, vs Fc<sup>+0</sup>), E<sub>1/2</sub> / V, ΔE<sub>p</sub> / mV, *i*<sub>backward</sub>/*i*<sub>forward</sub>: -0.131, 79, 0.49; -0.010, 79, 0.72; -1.337, 115, 0.67; -1.566, 136, 0.87.

**[(NC)Ru<sub>2</sub>(ap)<sub>4</sub>]<sub>2</sub>(μ-1,4-C<sub>6</sub>H<sub>4</sub>) (2)**. A stock solution of **1** was made from 29.8 mg in 90 mL THF (2.42 x 10<sup>-4</sup> M **1**). To 30.0 mL of the stock solution, [NBu<sub>4</sub>][CN] (15 mg, 0.06 mmol) in 5.0 mL THF was added. An immediate color change from dark brown-green to deep red was observed. O<sub>2</sub> was bubbled through this solution for 2 hours, resulting in a color change from red to a red-purple. The solvent was removed, and the product extracted from CH<sub>2</sub>Cl<sub>2</sub>/H<sub>2</sub>O. The organic layers were combined and dried with Na<sub>2</sub>SO<sub>4</sub>. Removal of solvent gave a deep purple

solid, and purification was achieved through a 1:20 (v:v) CH<sub>2</sub>Cl<sub>2</sub>/hexanes recrystallization at room temperature. Single crystals suitable for X-ray diffraction were grown by layering diethyl ether over a concentrated solution of **2** in THF. Yield: 7 mg, 59%. Elem. Anal. Found (Calcd) for C<sub>101.5</sub>H<sub>87</sub>N<sub>18</sub>Cl<sub>3</sub>O<sub>1</sub>Ru<sub>4</sub> (**2**·1.5CH<sub>2</sub>Cl<sub>2</sub>·THF): C, 58.46 (58.15); H, 4.20 (4.29); N, 12.09 (11.88). ESI-MS (*m/z*, based on <sup>101</sup>Ru): [M – 2 CN]<sup>2+</sup> = 917.0. UV-Vis (in THF) λ / nm (ε / M<sup>-1</sup> cm<sup>-1</sup>): 346 (29400), 552 (8800), (sh)599 (7800), 756 (4700), 1025 (5500). IR ν / cm<sup>-1</sup>: 2099 ν(C≡N). μ<sub>eff</sub> (21°C) (Evans method) = 2.18 μ<sub>B</sub>. Electrochemistry (THF, vs Fc<sup>+0</sup>), E<sub>1/2</sub> / V, ΔE<sub>p</sub> / mV, *i*<sub>backward</sub>/*i*<sub>forward</sub>: 0.299, 92, 0.63; 0.008, 66, 0.83; -0.913, 62, 0.94; -1.09, 62, 0.61. <sup>1</sup>H NMR (300 MHz, CDCl<sub>3</sub>) δ = 8.20 (d, *J* = 6.4 Hz, 8H, H(a)), 7.22 – 6.99 (m, 32H, H(b,c,f,h)), 6.40 (d, *J* = 9.0 Hz, 8H, H(d)), 6.24 (t, *J* = 6.3 Hz, 12H, H(g,j)), 6.12 (s, 8H, H(i)), 5.62 (s, 8H, H(e)). Isosbestic points for **2** → **2**<sup>+</sup>: ca. 15000 cm<sup>-1</sup> and ca. 23000 cm<sup>-1</sup>; isosbestic points for **2**<sup>+</sup> → **2**<sup>2+</sup>: 7500 cm<sup>-1</sup> and ca. 23000 cm<sup>-1</sup>.

(NC)Ru<sub>2</sub>(*ap*)<sub>4</sub>(C<sub>6</sub>H<sub>5</sub>) (**3**). Ru<sub>2</sub>(*ap*)<sub>4</sub>(C<sub>6</sub>H<sub>5</sub>) (48.9 mg (0.05 mmol)) was dissolved in 20 mL THF, to which 23 mg KCN in 6 mL THF/MeOH (1:1 v/v) was added. An immediate color change from dark green to red was observed. Upon bubbling O<sub>2</sub> for ~10 minutes, the solution darkened to a deep purple. After removing the solvent, the product was extracted with three DCM/H<sub>2</sub>O washes and the organic layer dried with Na<sub>2</sub>SO<sub>4</sub>. Removal of the solvent gave a deep purple solid, and purification achieved with a room temperature 1:20 CH<sub>2</sub>Cl<sub>2</sub>/hexanes (v/v) recrystallization. Single crystals suitable for X-ray diffraction were grown by layering pentane over a concentrated solution of **3** in ethyl acetate. Yield: 44 mg, 88%. Elem. Anal. Found (Calcd) for C<sub>52</sub>H<sub>44</sub>N<sub>9</sub>Cl<sub>2</sub>ORu<sub>2</sub> (**3**·CH<sub>2</sub>Cl<sub>2</sub>·H<sub>2</sub>O): C, 57.57 (57.62); H, 3.99 (4.09); N, 11.25 (11.63). ESI-MS (*m/z*, based on <sup>101</sup>Ru): [M]<sup>+</sup> = 982.3. UV-Vis (in THF) λ / nm (ε / M<sup>-1</sup> cm<sup>-1</sup>): 341 (17500), 553 (6900), (sh)597 (6100), (sh)611 (4200), 958 (4700), (sh)1166 (2600). IR ν / cm<sup>-1</sup>: 2089

$\bar{\nu}(\text{C}\equiv\text{N})$ .  $\mu_{\text{eff}}$  (21°C) (Evans method) = 2.26  $\mu_{\text{B}}$ . Electrochemistry (THF, vs  $\text{Fc}^{+/0}$ ),  $E_{1/2}$  / V,  $\Delta E_p$  / mV,  $i_{\text{backward}}/i_{\text{forward}}$ : 0.21, 82, 0.99; -0.916, 82, 0.95.  $^1\text{H}$  NMR (300 MHz,  $\text{CDCl}_3$ )  $\delta$  = 7.97 (d,  $J$  = 1.7 Hz, 4H, H(a)), 7.19 – 6.98 (m, 18H, H(b,c,f,h,k)), 6.92 (t,  $J$  = 7.0 Hz, 1H, H(m)), 6.63 (d,  $J$  = 7.8 Hz, 2H, H(j)), 6.40 (d,  $J$  = 8.8 Hz, 4H, H(d)), 6.20 (t,  $J$  = 6.5 Hz, 4H, H(g)), 6.09 (s, 4H, H(i)), 5.58 (s, 4H, H(e)). Isosbestic points for  $\mathbf{3} \rightarrow \mathbf{3}^+$ : ca. 15000  $\text{cm}^{-1}$ .

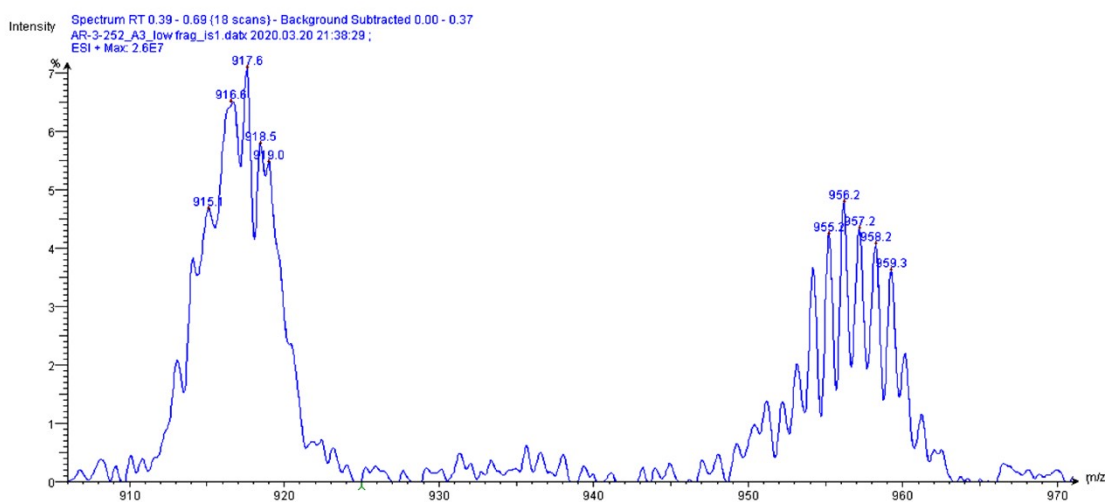

**Fig. S1** ESI-MS of the crude reaction mixture of **1** at low fragmentation voltages. Isotopic distribution characteristic of  $(\text{Ru}_2)_2$  corresponding to  $[\mathbf{1}]^{2+}$  ( $m/z = 1835.04 / 2 = 917.52$ , left). Protonolysis product  $\text{Ru}_2(\text{ap})_4(\text{C}_6\text{H}_5)$  (right).

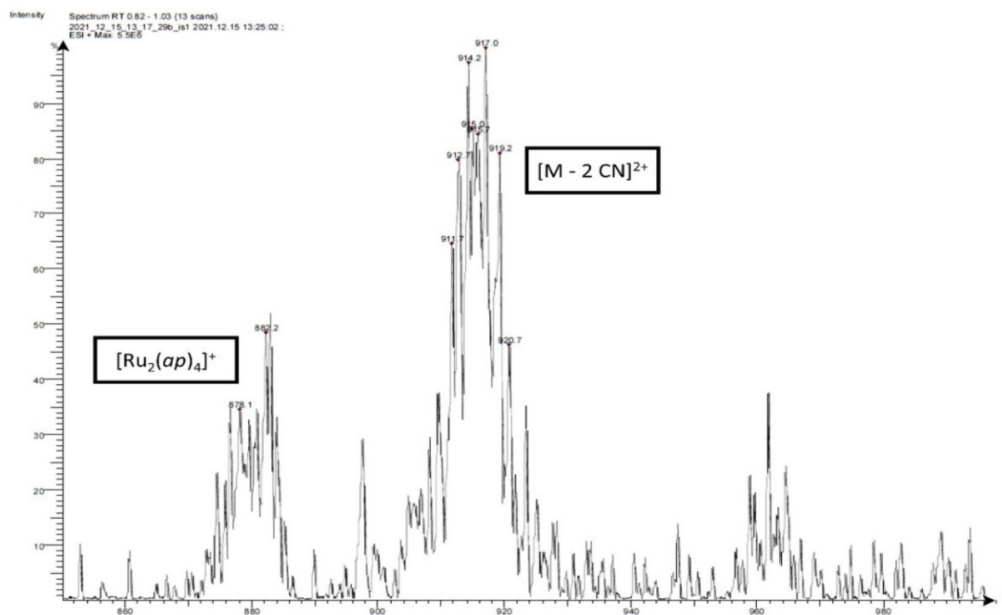

**Fig. S2** ESI-MS of **2** at high fragmentation voltages. Isotopic distribution characteristic of  $(\text{Ru}_2)_2$  corresponding to  $[\text{2} - 2 \text{CN}]^{2+}$  ( $m/z = (1886.06 - 2(26.02)) / 2 = 917.01$ , middle). Fragmentation product  $[\text{Ru}_2(\text{ap})_4]^+$  (left).

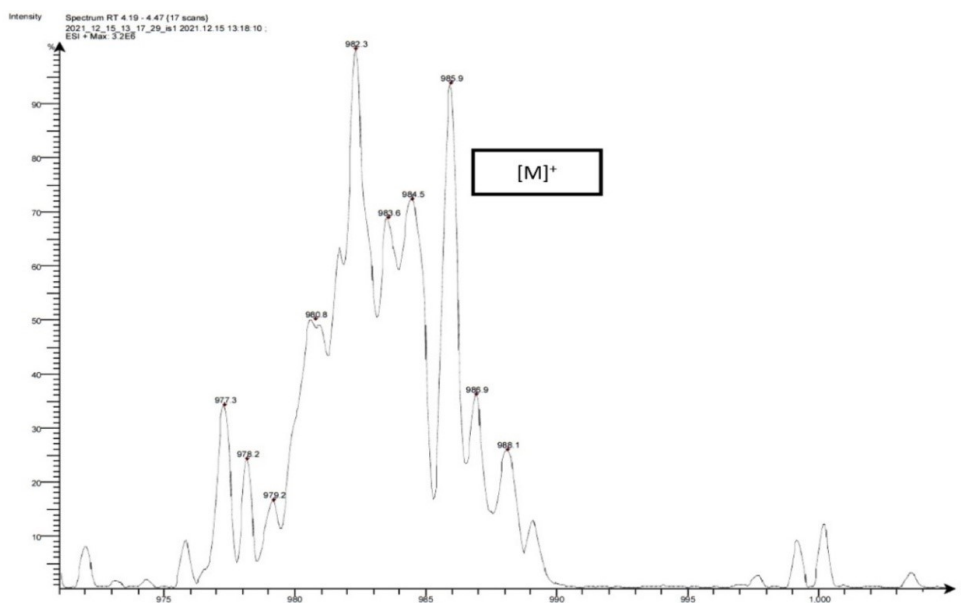

**Fig. S3** ESI-MS of **3** at low fragmentation voltages. Isotopic distribution characteristic of  $\text{Ru}_2$  corresponding to  $[\text{3}]^+$  ( $m/z = 982.09$ ).



## 2. X-ray Structural analysis

Crystals suitable for X-ray diffraction analysis were grown by either layering diethyl ether over a concentrated solution of **2** in THF or layering pentane over a concentrated solution of **3** in ethyl acetate. Single crystals of **2** were coated with paraffin oil and quickly transferred to the goniometer head of a Bruker Quest diffractometer with kappa geometry, an I- $\mu$ -S microsource X-ray tube, laterally graded multilayer (Goebel) mirror single crystal for monochromatization, a Photon-III C14 area detector and an Oxford Cryosystems low temperature device. Examination and data collection were performed with Cu K $\alpha$  radiation ( $\lambda = 1.54178 \text{ \AA}$ ) at 150 K. Single crystals of **3** were coated with paraffin oil and quickly transferred to the goniometer head of a Bruker Quest diffractometer with a fixed chi angle, a sealed tube fine focus X-ray tube, single crystal curved graphite incident beam monochromator, a Photon II area detector, and an Oxford Cryosystems low temperature device. Examination and data collection were performed with Mo K $\alpha$  radiation ( $\lambda = 0.71073 \text{ \AA}$ ) at 150 K. In one of the structures (**2**), only part of the solvent molecules were sufficiently resolved to model, and were included as partially occupied. Based on the XRD data it was not possible to determine whether the remaining volume remained unoccupied, or if additional highly disordered solvate molecules are present. A complete removal of the partially occupied solvent molecules via the Squeeze procedure did not substantially improve the overall quality of the structure, and we thus decided to include the resolved fraction of the void content as partially occupied solvate molecules.

Data were collected, reflections were indexed and processed, and the files scaled and corrected for absorption using APEX3<sup>7</sup> and SADABS.<sup>8</sup> The space groups were assigned using XPREP within the SHELXTL suite of programs<sup>9, 10</sup> and solved by direct methods using ShelXS<sup>10</sup> or dual methods using ShelXT<sup>11</sup> and refined by full matrix least squares against  $F^2$  with all reflections

using Shelxl2018<sup>12, 13</sup> using the graphical interface Shelxle.<sup>14</sup> Complete crystallographic data, in CIF format, have been deposited with the Cambridge Crystallographic Data Centre. CCDC 2149734-2149735 contains the supplementary crystallographic data for this paper. These data can be obtained free of charge from The Cambridge Crystallographic Data Centre via [www.ccdc.cam.ac.uk/data\\_request/cif](http://www.ccdc.cam.ac.uk/data_request/cif)

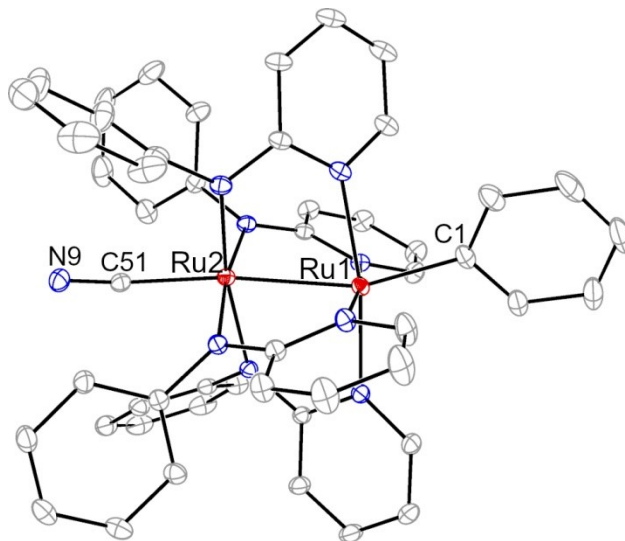

**Fig. S4** Molecular structure of **3** at 30% probability level. Hydrogen atoms and solvent molecules omitted for clarity. Full atom labels below.

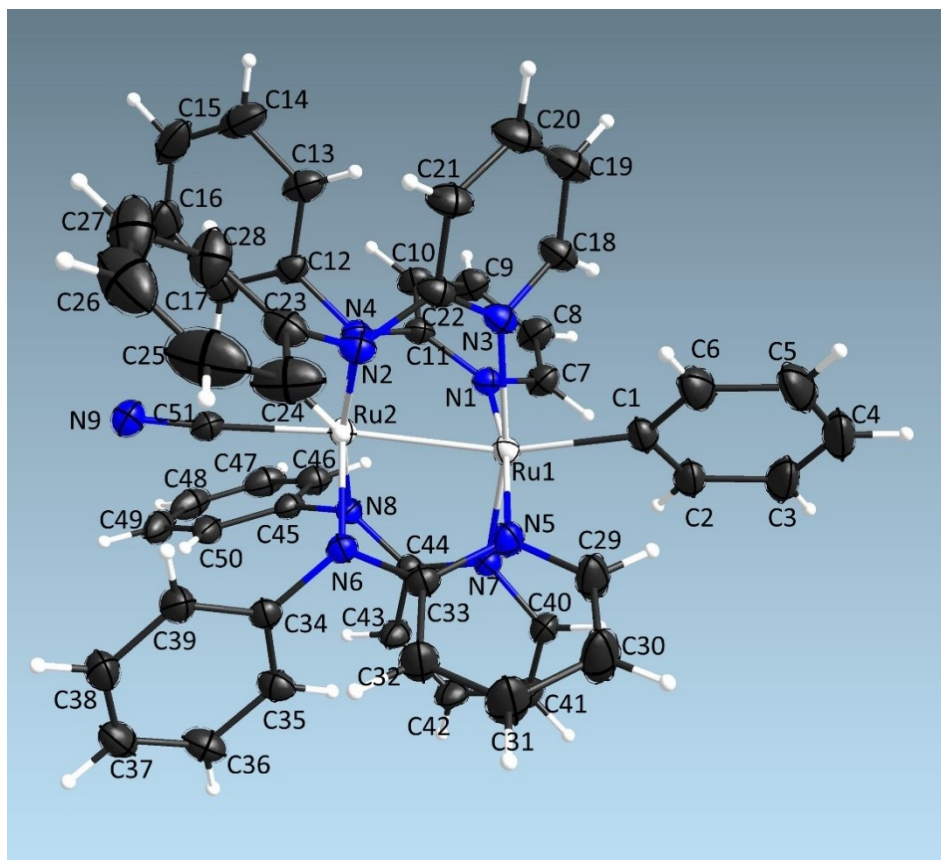

**Table S1** Full bond lengths and angles for **3**.

|         |             |         |           |
|---------|-------------|---------|-----------|
| Ru1—N7  | 2.0293 (13) | C15—C16 | 1.376 (4) |
| Ru1—N1  | 2.0423 (13) | C16—C17 | 1.389 (3) |
| Ru1—C1  | 2.0523 (16) | C18—C19 | 1.372 (2) |
| Ru1—N5  | 2.1331 (13) | C19—C20 | 1.393 (3) |
| Ru1—N3  | 2.1589 (13) | C20—C21 | 1.371 (3) |
| Ru1—Ru2 | 2.5011 (2)  | C21—C22 | 1.423 (2) |
| Ru2—N4  | 1.9775 (13) | C23—C24 | 1.383 (3) |
| Ru2—N6  | 1.9963 (12) | C23—C28 | 1.385 (3) |
| Ru2—C51 | 2.0081 (15) | C24—C25 | 1.400 (3) |
| Ru2—N2  | 2.0399 (12) | C25—C26 | 1.366 (4) |
| Ru2—N8  | 2.1462 (12) | C26—C27 | 1.377 (4) |
| N1—C7   | 1.360 (2)   | C27—C28 | 1.392 (3) |
| N1—C11  | 1.3817 (19) | C29—C30 | 1.373 (3) |
| N2—C11  | 1.3515 (19) | C30—C31 | 1.395 (3) |
| N2—C12  | 1.4354 (19) | C31—C32 | 1.361 (2) |
| N3—C18  | 1.360 (2)   | C32—C33 | 1.426 (2) |
| N3—C22  | 1.371 (2)   | C34—C39 | 1.390 (2) |
| N4—C22  | 1.355 (2)   | C34—C35 | 1.397 (2) |

|            |             |             |             |
|------------|-------------|-------------|-------------|
| N4—C23     | 1.429 (2)   | C35—C36     | 1.385 (2)   |
| N5—C29     | 1.365 (2)   | C36—C37     | 1.387 (3)   |
| N5—C33     | 1.373 (2)   | C37—C38     | 1.380 (3)   |
| N6—C33     | 1.3581 (19) | C38—C39     | 1.391 (2)   |
| N6—C34     | 1.4296 (19) | C40—C41     | 1.366 (2)   |
| N7—C40     | 1.3669 (19) | C41—C42     | 1.399 (3)   |
| N7—C44     | 1.3750 (19) | C42—C43     | 1.369 (2)   |
| N8—C44     | 1.3589 (19) | C43—C44     | 1.426 (2)   |
| N8—C45     | 1.4261 (19) | C45—C50     | 1.393 (2)   |
| N9—C51     | 1.156 (2)   | C45—C46     | 1.401 (2)   |
| C1—C2      | 1.402 (3)   | C46—C47     | 1.392 (2)   |
| C1—C6      | 1.403 (2)   | C47—C48     | 1.382 (3)   |
| C2—C3      | 1.399 (3)   | C48—C49     | 1.385 (3)   |
| C3—C4      | 1.382 (4)   | C49—C50     | 1.399 (2)   |
| C4—C5      | 1.377 (4)   |             |             |
| C5—C6      | 1.398 (3)   |             |             |
| C7—C8      | 1.371 (2)   |             |             |
| C8—C9      | 1.400 (3)   |             |             |
| C9—C10     | 1.368 (2)   |             |             |
| C10—C11    | 1.430 (2)   |             |             |
| C12—C13    | 1.389 (2)   |             |             |
| C12—C17    | 1.390 (2)   |             |             |
| C13—C14    | 1.397 (3)   |             |             |
| C14—C15    | 1.384 (4)   |             |             |
|            |             |             |             |
| N7—Ru1—N1  | 93.24 (5)   | C13—C12—N2  | 118.26 (15) |
| N7—Ru1—C1  | 107.46 (6)  | C17—C12—N2  | 121.83 (15) |
| N1—Ru1—C1  | 100.30 (6)  | C12—C13—C14 | 119.77 (19) |
| N7—Ru1—N5  | 83.83 (5)   | C15—C14—C13 | 120.0 (2)   |
| N1—Ru1—N5  | 172.15 (5)  | C16—C15—C14 | 120.09 (19) |
| C1—Ru1—N5  | 87.54 (6)   | C15—C16—C17 | 120.5 (2)   |
| N7—Ru1—N3  | 169.38 (5)  | C16—C17—C12 | 119.7 (2)   |
| N1—Ru1—N3  | 83.06 (5)   | N3—C18—C19  | 124.03 (17) |
| C1—Ru1—N3  | 83.03 (6)   | C18—C19—C20 | 118.39 (17) |
| N5—Ru1—N3  | 98.53 (5)   | C21—C20—C19 | 119.24 (16) |
| N7—Ru1—Ru2 | 93.80 (4)   | C20—C21—C22 | 119.53 (17) |
| N1—Ru1—Ru2 | 88.63 (4)   | N4—C22—N3   | 117.21 (13) |
| C1—Ru1—Ru2 | 156.27 (5)  | N4—C22—C21  | 122.56 (15) |
| N5—Ru1—Ru2 | 84.31 (4)   | N3—C22—C21  | 120.05 (15) |
| N3—Ru1—Ru2 | 76.22 (4)   | C24—C23—C28 | 119.55 (18) |
| N4—Ru2—N6  | 92.91 (5)   | C24—C23—N4  | 119.78 (18) |
| N4—Ru2—C51 | 95.46 (6)   | C28—C23—N4  | 120.67 (15) |
| N6—Ru2—C51 | 92.54 (6)   | C23—C24—C25 | 119.5 (2)   |
| N4—Ru2—N2  | 92.90 (5)   | C26—C25—C24 | 120.9 (2)   |
| N6—Ru2—N2  | 171.08 (5)  | C25—C26—C27 | 119.6 (2)   |

|             |             |             |             |
|-------------|-------------|-------------|-------------|
| C51—Ru2—N2  | 93.64 (6)   | C9—C10—C11  | 121.27 (15) |
| N4—Ru2—N8   | 171.05 (5)  | N2—C11—N1   | 118.37 (13) |
| N6—Ru2—N8   | 87.75 (5)   | N2—C11—C10  | 122.71 (14) |
| C51—Ru2—N8  | 93.42 (5)   | N1—C11—C10  | 118.90 (14) |
| N2—Ru2—N8   | 85.47 (5)   | C13—C12—C17 | 119.91 (16) |
| N4—Ru2—Ru1  | 93.55 (4)   | C26—C27—C28 | 120.4 (3)   |
| N6—Ru2—Ru1  | 88.40 (4)   | C23—C28—C27 | 120.1 (2)   |
| C51—Ru2—Ru1 | 170.88 (4)  | N5—C29—C30  | 124.60 (17) |
| N2—Ru2—Ru1  | 84.48 (4)   | C29—C30—C31 | 118.99 (17) |
| N8—Ru2—Ru1  | 77.54 (3)   | C32—C31—C30 | 118.48 (17) |
| C7—N1—C11   | 118.23 (13) | C31—C32—C33 | 120.72 (16) |
| C7—N1—Ru1   | 122.87 (11) | N6—C33—N5   | 118.90 (13) |
| C11—N1—Ru1  | 118.66 (10) | N6—C33—C32  | 120.25 (14) |
| C11—N2—C12  | 115.22 (12) | N5—C33—C32  | 120.81 (14) |
| C11—N2—Ru2  | 123.49 (10) | C39—C34—C35 | 119.41 (15) |
| C12—N2—Ru2  | 121.05 (10) | C39—C34—N6  | 122.07 (14) |
| C18—N3—C22  | 116.88 (14) | C35—C34—N6  | 118.50 (13) |
| C18—N3—Ru1  | 119.34 (11) | C36—C35—C34 | 120.41 (16) |
| C22—N3—Ru1  | 123.78 (10) | C35—C36—C37 | 119.88 (17) |
| C22—N4—C23  | 118.32 (13) | C38—C37—C36 | 119.88 (16) |
| C22—N4—Ru2  | 114.63 (10) | C37—C38—C39 | 120.68 (17) |
| C23—N4—Ru2  | 126.56 (10) | C34—C39—C38 | 119.70 (16) |
| C29—N5—C33  | 116.29 (14) | C41—C40—N7  | 123.15 (15) |
| C29—N5—Ru1  | 123.23 (11) | C40—C41—C42 | 118.23 (15) |
| C33—N5—Ru1  | 119.21 (10) | C43—C42—C41 | 119.95 (16) |
| C33—N6—C34  | 115.55 (12) | C42—C43—C44 | 120.51 (15) |
| C33—N6—Ru2  | 121.39 (10) | N8—C44—N7   | 118.41 (13) |
| C34—N6—Ru2  | 122.29 (9)  | N8—C44—C43  | 123.14 (13) |
| C40—N7—C44  | 119.37 (13) | N7—C44—C43  | 118.36 (13) |
| C40—N7—Ru1  | 126.78 (11) | C50—C45—C46 | 119.27 (15) |
| C44—N7—Ru1  | 113.77 (10) | C50—C45—N8  | 122.54 (14) |
| C44—N8—C45  | 113.46 (12) | C46—C45—N8  | 118.16 (14) |
| C44—N8—Ru2  | 124.34 (10) | C47—C46—C45 | 120.49 (18) |
| C45—N8—Ru2  | 122.14 (9)  | C48—C47—C46 | 120.00 (18) |
| C2—C1—C6    | 116.74 (16) | C47—C48—C49 | 119.81 (16) |
| C2—C1—Ru1   | 114.69 (12) | C48—C49—C50 | 120.84 (18) |
| C6—C1—Ru1   | 128.43 (15) | C45—C50—C49 | 119.50 (17) |
| C3—C2—C1    | 121.74 (19) | N9—C51—Ru2  | 173.73 (14) |
| C4—C3—C2    | 120.3 (2)   |             |             |
| C5—C4—C3    | 119.06 (19) |             |             |
| C4—C5—C6    | 121.1 (2)   |             |             |
| C5—C6—C1    | 121.1 (2)   |             |             |
| N1—C7—C8    | 124.05 (16) |             |             |
| C7—C8—C9    | 118.81 (16) |             |             |
| C10—C9—C8   | 118.71 (15) |             |             |

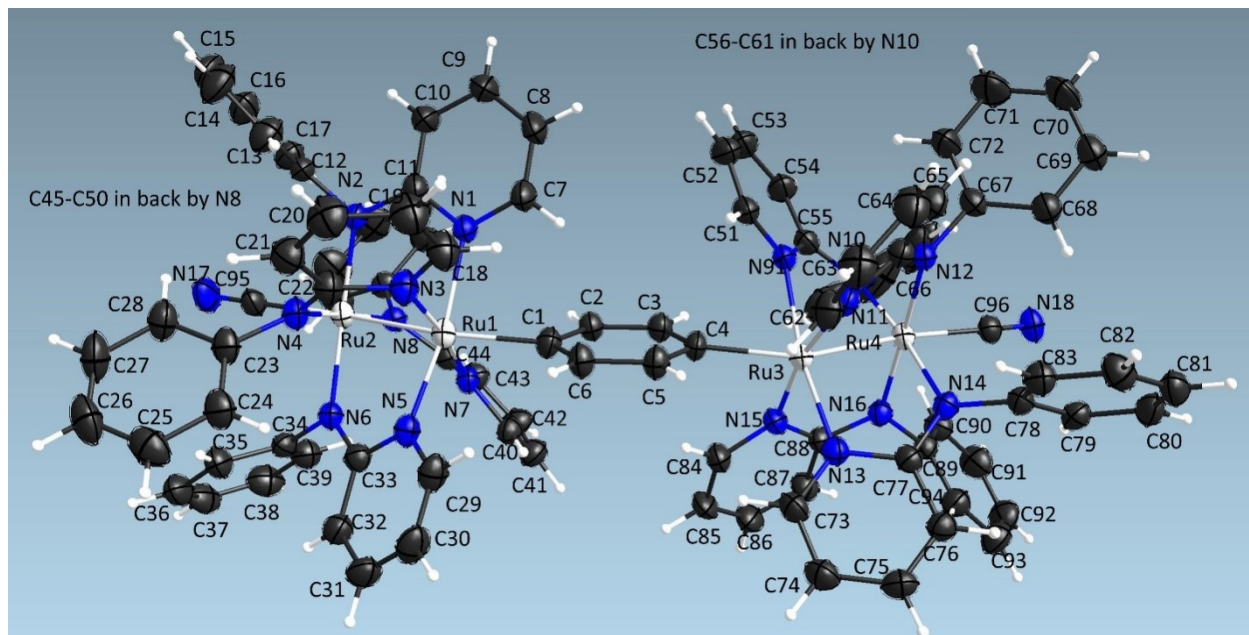

Full list of atom numbers for compound **2**. *ap* ligand numbers:

N1/N2 and C7-C17; N3/N4 and C18-C28; N5/N6 and C29-C39; N7/N8 and C40-C50  
 N9/N10 and C51-C61; N11/N12 and C62-C72; N13/N14 and C73-C83; N15/N16 and C84-C94

**Table S2** Full bond lengths and angles for **2**.

|         |            |         |           |
|---------|------------|---------|-----------|
| Ru1—N3  | 2.031 (3)  | C36—C37 | 1.376 (6) |
| Ru1—N5  | 2.036 (3)  | C37—C38 | 1.381 (6) |
| Ru1—C1  | 2.052 (3)  | C38—C39 | 1.391 (5) |
| Ru1—N1  | 2.153 (3)  | C40—C41 | 1.367 (5) |
| Ru1—N7  | 2.155 (3)  | C41—C42 | 1.393 (5) |
| Ru1—Ru2 | 2.4892 (3) | C42—C43 | 1.370 (5) |
| Ru2—N8  | 1.973 (3)  | C43—C44 | 1.417 (5) |
| Ru2—N2  | 1.985 (3)  | C45—C50 | 1.386 (5) |
| Ru2—C95 | 2.019 (3)  | C45—C46 | 1.389 (5) |
| Ru2—N6  | 2.045 (3)  | C46—C47 | 1.380 (6) |
| Ru2—N4  | 2.200 (3)  | C47—C48 | 1.353 (7) |
| Ru3—N11 | 2.024 (3)  | C48—C49 | 1.390 (8) |
| Ru3—N13 | 2.042 (3)  | C49—C50 | 1.392 (6) |
| Ru3—C4  | 2.051 (3)  | C51—C52 | 1.375 (5) |
| Ru3—N15 | 2.119 (3)  | C52—C53 | 1.391 (6) |
| Ru3—N9  | 2.165 (3)  | C53—C54 | 1.361 (6) |
| Ru3—Ru4 | 2.4829 (3) | C5—C6   | 1.409 (4) |
| Ru4—N10 | 1.969 (3)  | C7—C8   | 1.349 (6) |

|         |           |         |            |
|---------|-----------|---------|------------|
| Ru4—N16 | 1.982 (3) | C8—C9   | 1.398 (6)  |
| Ru4—C96 | 2.013 (3) | C9—C10  | 1.365 (5)  |
| Ru4—N12 | 2.073 (3) | C10—C11 | 1.413 (5)  |
| Ru4—N14 | 2.169 (3) | C12—C13 | 1.376 (5)  |
| N1—C11  | 1.368 (4) | C12—C17 | 1.383 (5)  |
| N1—C7   | 1.374 (4) | C13—C14 | 1.394 (6)  |
| N2—C11  | 1.362 (4) | C14—C15 | 1.379 (7)  |
| N2—C12  | 1.444 (4) | C15—C16 | 1.374 (6)  |
| N3—C18  | 1.359 (5) | C16—C17 | 1.387 (5)  |
| N3—C22  | 1.372 (4) | C18—C19 | 1.364 (5)  |
| N4—C22  | 1.357 (4) | C19—C20 | 1.396 (6)  |
| N4—C23  | 1.427 (4) | C20—C21 | 1.363 (6)  |
| N5—C29  | 1.360 (4) | C21—C22 | 1.418 (5)  |
| N5—C33  | 1.378 (4) | C23—C28 | 1.394 (5)  |
| N6—C33  | 1.358 (4) | C23—C24 | 1.399 (5)  |
| N6—C34  | 1.446 (4) | C24—C25 | 1.389 (5)  |
| N7—C44  | 1.362 (4) | C25—C26 | 1.383 (7)  |
| N7—C40  | 1.367 (4) | C26—C27 | 1.370 (7)  |
| N8—C44  | 1.362 (4) | C27—C28 | 1.388 (6)  |
| N8—C45  | 1.425 (4) | C29—C30 | 1.362 (6)  |
| N9—C51  | 1.355 (4) | C30—C31 | 1.392 (6)  |
| N9—C55  | 1.361 (4) | C31—C32 | 1.361 (5)  |
| N10—C55 | 1.355 (4) | C32—C33 | 1.425 (5)  |
| N10—C56 | 1.431 (5) | C34—C35 | 1.382 (5)  |
| N11—C62 | 1.363 (4) | C34—C39 | 1.391 (5)  |
| N11—C66 | 1.380 (4) | C35—C36 | 1.394 (5)  |
| N12—C66 | 1.345 (4) | C54—C55 | 1.418 (5)  |
| N12—C67 | 1.430 (4) | C56—C57 | 1.380 (6)  |
| N13—C73 | 1.357 (4) | C56—C61 | 1.387 (6)  |
| N13—C77 | 1.375 (4) | C57—C58 | 1.408 (7)  |
| N14—C77 | 1.354 (4) | C58—C59 | 1.355 (11) |
| N14—C78 | 1.430 (4) | C59—C60 | 1.356 (10) |
| N15—C88 | 1.365 (4) | C60—C61 | 1.390 (7)  |
| N15—C84 | 1.369 (4) | C62—C63 | 1.363 (5)  |
| N16—C88 | 1.357 (4) | C63—C64 | 1.406 (6)  |
| N16—C89 | 1.425 (4) | C64—C65 | 1.360 (5)  |
| N17—C95 | 1.140 (4) | C65—C66 | 1.430 (5)  |
| N18—C96 | 1.143 (4) | C67—C72 | 1.379 (5)  |
| C1—C6   | 1.393 (5) | C67—C68 | 1.387 (5)  |
| C1—C2   | 1.399 (4) | C68—C69 | 1.391 (5)  |
| C2—C3   | 1.389 (4) | C69—C70 | 1.360 (6)  |
| C3—C4   | 1.401 (4) | C70—C71 | 1.381 (7)  |
| C4—C5   | 1.381 (4) | C71—C72 | 1.390 (6)  |
| C73—C74 | 1.369 (5) |         |            |
| C74—C75 | 1.405 (5) |         |            |

|            |             |             |           |
|------------|-------------|-------------|-----------|
| C75—C76    | 1.366 (5)   |             |           |
| C76—C77    | 1.424 (4)   |             |           |
| C78—C79    | 1.388 (5)   |             |           |
| C78—C83    | 1.402 (5)   |             |           |
| C79—C80    | 1.389 (5)   |             |           |
| C80—C81    | 1.387 (5)   |             |           |
| C81—C82    | 1.380 (5)   |             |           |
| C82—C83    | 1.391 (5)   |             |           |
| C84—C85    | 1.359 (5)   |             |           |
| C85—C86    | 1.390 (6)   |             |           |
| C86—C87    | 1.362 (5)   |             |           |
| C87—C88    | 1.426 (5)   |             |           |
| C89—C94    | 1.387 (5)   |             |           |
| C89—C90    | 1.392 (5)   |             |           |
| C90—C91    | 1.390 (5)   |             |           |
| C91—C92    | 1.378 (6)   |             |           |
| C92—C93    | 1.386 (6)   |             |           |
| C93—C94    | 1.385 (5)   |             |           |
|            |             |             |           |
| N3—Ru1—N5  | 93.66 (11)  | C5—C4—C3    | 117.2 (3) |
| N3—Ru1—C1  | 107.02 (12) | C5—C4—Ru3   | 121.4 (2) |
| N5—Ru1—C1  | 103.61 (12) | C3—C4—Ru3   | 121.3 (2) |
| N3—Ru1—N1  | 81.04 (11)  | C4—C5—C6    | 121.4 (3) |
| N5—Ru1—N1  | 170.96 (10) | C1—C6—C5    | 121.5 (3) |
| C1—Ru1—N1  | 85.01 (12)  | C8—C7—N1    | 125.0 (3) |
| N3—Ru1—N7  | 172.22 (11) | C7—C8—C9    | 119.6 (4) |
| N5—Ru1—N7  | 82.96 (10)  | C10—C9—C8   | 117.2 (4) |
| C1—Ru1—N7  | 80.64 (11)  | C9—C10—C11  | 121.5 (4) |
| N1—Ru1—N7  | 101.36 (10) | N2—C11—N1   | 118.6 (3) |
| N3—Ru1—Ru2 | 96.34 (8)   | N2—C11—C10  | 120.6 (3) |
| N5—Ru1—Ru2 | 89.40 (7)   | N1—C11—C10  | 120.8 (3) |
| C1—Ru1—Ru2 | 152.21 (9)  | C13—C12—C17 | 120.2 (3) |
| N1—Ru1—Ru2 | 83.95 (7)   | C13—C12—N2  | 118.7 (3) |
| N7—Ru1—Ru2 | 76.67 (7)   | C17—C12—N2  | 121.0 (3) |
| N8—Ru2—N2  | 91.89 (11)  | C12—C13—C14 | 119.8 (4) |
| N8—Ru2—C95 | 97.94 (12)  | C15—C14—C13 | 119.9 (4) |
| N2—Ru2—C95 | 91.40 (12)  | C16—C15—C14 | 120.1 (4) |
| N8—Ru2—N6  | 93.69 (11)  | C15—C16—C17 | 120.2 (4) |
| N2—Ru2—N6  | 172.66 (11) | C12—C17—C16 | 119.8 (4) |
| C95—Ru2—N6 | 92.53 (12)  | N3—C18—C19  | 122.7 (3) |
| N8—Ru2—N4  | 169.65 (10) | C18—C19—C20 | 118.1 (4) |
| N2—Ru2—N4  | 89.12 (11)  | C21—C20—C19 | 120.4 (3) |
| C95—Ru2—N4 | 92.33 (12)  | C20—C21—C22 | 120.3 (4) |
| N6—Ru2—N4  | 84.53 (11)  | N4—C22—N3   | 118.4 (3) |
| N8—Ru2—Ru1 | 93.84 (8)   | N4—C22—C21  | 123.3 (3) |



|             |             |             |           |
|-------------|-------------|-------------|-----------|
| N2—Ru2—Ru1  | 90.40 (8)   | N3—C22—C21  | 118.2 (3) |
| C95—Ru2—Ru1 | 168.02 (10) | C28—C23—C24 | 118.2 (3) |
| N6—Ru2—Ru1  | 84.48 (7)   | C28—C23—N4  | 122.9 (3) |
| N4—Ru2—Ru1  | 75.86 (7)   | C24—C23—N4  | 118.9 (3) |
| N11—Ru3—N13 | 90.71 (11)  | C25—C24—C23 | 121.3 (4) |
| N11—Ru3—C4  | 106.84 (12) | C26—C25—C24 | 119.5 (4) |
| N13—Ru3—C4  | 111.65 (12) | C27—C26—C25 | 119.8 (4) |
| N11—Ru3—N15 | 168.67 (10) | C26—C27—C28 | 121.4 (4) |
| N13—Ru3—N15 | 80.59 (11)  | C27—C28—C23 | 119.9 (4) |
| C4—Ru3—N15  | 83.27 (12)  | N5—C29—C30  | 124.1 (3) |
| N11—Ru3—N9  | 83.98 (11)  | C29—C30—C31 | 118.4 (3) |
| N13—Ru3—N9  | 170.34 (10) | C32—C31—C30 | 119.6 (4) |
| C4—Ru3—N9   | 77.70 (12)  | C31—C32—C33 | 120.7 (4) |
| N15—Ru3—N9  | 103.56 (11) | N6—C33—N5   | 117.8 (3) |
| N11—Ru3—Ru4 | 89.82 (8)   | N6—C33—C32  | 123.3 (3) |
| N13—Ru3—Ru4 | 95.84 (8)   | N5—C33—C32  | 118.8 (3) |
| C4—Ru3—Ru4  | 147.14 (9)  | C35—C34—C39 | 120.1 (3) |
| N15—Ru3—Ru4 | 83.91 (7)   | C35—C34—N6  | 118.3 (3) |
| N9—Ru3—Ru4  | 76.13 (7)   | C39—C34—N6  | 121.6 (3) |
| N10—Ru4—N16 | 91.98 (11)  | C34—C35—C36 | 119.4 (4) |
| N10—Ru4—C96 | 95.31 (12)  | C37—C36—C35 | 120.7 (4) |
| N16—Ru4—C96 | 89.61 (12)  | C36—C37—C38 | 119.7 (4) |
| N10—Ru4—N12 | 92.39 (11)  | C37—C38—C39 | 120.3 (4) |
| N16—Ru4—N12 | 173.11 (11) | C34—C39—C38 | 119.7 (4) |
| C96—Ru4—N12 | 95.28 (11)  | C41—C40—N7  | 124.1 (3) |
| N10—Ru4—N14 | 170.83 (11) | C40—C41—C42 | 118.3 (3) |
| N16—Ru4—N14 | 89.18 (10)  | C43—C42—C41 | 119.3 (3) |
| C96—Ru4—N14 | 93.80 (11)  | C42—C43—C44 | 119.7 (3) |
| N12—Ru4—N14 | 85.66 (10)  | N8—C44—N7   | 117.1 (3) |
| N10—Ru4—Ru3 | 94.06 (8)   | N8—C44—C43  | 122.1 (3) |
| N16—Ru4—Ru3 | 90.89 (8)   | N7—C44—C43  | 120.6 (3) |
| C96—Ru4—Ru3 | 170.60 (9)  | C50—C45—C46 | 120.0 (3) |
| N12—Ru4—Ru3 | 83.49 (7)   | C50—C45—N8  | 121.3 (3) |
| N14—Ru4—Ru3 | 76.83 (7)   | C46—C45—N8  | 118.8 (3) |
| C11—N1—C7   | 115.6 (3)   | C47—C46—C45 | 119.8 (4) |
| C11—N1—Ru1  | 120.6 (2)   | C48—C47—C46 | 121.0 (4) |
| C7—N1—Ru1   | 121.7 (2)   | C47—C48—C49 | 119.6 (4) |
| C11—N2—C12  | 114.7 (3)   | C48—C49—C50 | 120.6 (5) |
| C11—N2—Ru2  | 122.0 (2)   | C45—C50—C49 | 118.9 (4) |
| C12—N2—Ru2  | 123.2 (2)   | N9—C51—C52  | 123.6 (4) |
| C18—N3—C22  | 120.0 (3)   | C51—C52—C53 | 118.4 (4) |
| C18—N3—Ru1  | 126.8 (2)   | C54—C53—C52 | 119.4 (4) |
| C22—N3—Ru1  | 112.9 (2)   | C53—C54—C55 | 119.5 (4) |
| C22—N4—C23  | 114.0 (3)   | N10—C55—N9  | 116.7 (3) |
| C22—N4—Ru2  | 124.7 (2)   | N10—C55—C54 | 122.4 (3) |

|             |           |             |           |
|-------------|-----------|-------------|-----------|
| C23—N4—Ru2  | 121.1 (2) | N9—C55—C54  | 120.7 (3) |
| C29—N5—C33  | 118.2 (3) | C57—C56—C61 | 120.3 (4) |
| C29—N5—Ru1  | 122.6 (2) | C57—C56—N10 | 120.9 (4) |
| C33—N5—Ru1  | 119.1 (2) | C61—C56—N10 | 118.8 (4) |
| C33—N6—C34  | 116.3 (3) | C56—C57—C58 | 118.4 (5) |
| C33—N6—Ru2  | 124.2 (2) | C59—C58—C57 | 121.0 (6) |
| C34—N6—Ru2  | 118.7 (2) | C58—C59—C60 | 120.3 (5) |
| C44—N7—C40  | 117.0 (3) | C59—C60—C61 | 120.7 (6) |
| C44—N7—Ru1  | 123.9 (2) | C56—C61—C60 | 119.3 (5) |
| C40—N7—Ru1  | 119.0 (2) | C63—C62—N11 | 123.4 (4) |
| C44—N8—C45  | 117.6 (3) | C62—C63—C64 | 118.3 (4) |
| C44—N8—Ru2  | 115.0 (2) | C65—C64—C63 | 119.5 (4) |
| C45—N8—Ru2  | 127.2 (2) | C64—C65—C66 | 120.9 (4) |
| C51—N9—C55  | 117.3 (3) | N12—C66—N11 | 118.3 (3) |
| C51—N9—Ru3  | 118.6 (2) | N12—C66—C65 | 123.6 (3) |
| C55—N9—Ru3  | 124.0 (2) | N11—C66—C65 | 118.0 (3) |
| C55—N10—C56 | 118.5 (3) | C72—C67—C68 | 119.4 (3) |
| C55—N10—Ru4 | 115.0 (2) | C72—C67—N12 | 118.6 (3) |
| C56—N10—Ru4 | 126.3 (2) | C68—C67—N12 | 121.9 (3) |
| C62—N11—C66 | 119.0 (3) | C67—C68—C69 | 120.1 (4) |
| C62—N11—Ru3 | 122.6 (2) | C70—C69—C68 | 120.4 (4) |
| C66—N11—Ru3 | 118.3 (2) | C69—C70—C71 | 120.0 (4) |
| C66—N12—C67 | 114.8 (3) | C70—C71—C72 | 120.2 (4) |
| C66—N12—Ru4 | 123.2 (2) | C67—C72—C71 | 120.0 (4) |
| C67—N12—Ru4 | 121.5 (2) | N13—C73—C74 | 123.1 (3) |
| C73—N13—C77 | 120.1 (3) | C73—C74—C75 | 118.0 (3) |
| C73—N13—Ru3 | 126.8 (2) | C76—C75—C74 | 119.7 (3) |
| C77—N13—Ru3 | 113.1 (2) | C75—C76—C77 | 120.9 (3) |
| C77—N14—C78 | 114.4 (3) | N14—C77—N13 | 118.3 (3) |
| C77—N14—Ru4 | 125.3 (2) | N14—C77—C76 | 123.6 (3) |
| C78—N14—Ru4 | 120.3 (2) | N13—C77—C76 | 118.0 (3) |
| C88—N15—C84 | 116.1 (3) | C79—C78—C83 | 119.1 (3) |
| C88—N15—Ru3 | 121.9 (2) | C79—C78—N14 | 123.1 (3) |
| C84—N15—Ru3 | 119.6 (2) | C83—C78—N14 | 117.8 (3) |
| C88—N16—C89 | 114.6 (3) | C78—C79—C80 | 119.9 (3) |
| C88—N16—Ru4 | 121.2 (2) | C81—C80—C79 | 120.8 (3) |
| C89—N16—Ru4 | 123.7 (2) | C82—C81—C80 | 119.7 (3) |
| C6—C1—C2    | 116.6 (3) | C81—C82—C83 | 120.1 (3) |
| C6—C1—Ru1   | 120.1 (2) | C82—C83—C78 | 120.4 (3) |
| C2—C1—Ru1   | 123.0 (2) | C85—C84—N15 | 125.3 (3) |
| C3—C2—C1    | 121.8 (3) | C84—C85—C86 | 118.2 (3) |
| C2—C3—C4    | 121.4 (3) | C87—C86—C85 | 119.2 (3) |
|             |           | C86—C87—C88 | 120.2 (3) |
|             |           | N16—C88—N15 | 118.7 (3) |
|             |           | N16—C88—C87 | 120.8 (3) |

|  |  |             |           |
|--|--|-------------|-----------|
|  |  | N15—C88—C87 | 120.5 (3) |
|  |  | C94—C89—C90 | 119.7 (3) |
|  |  | C94—C89—N16 | 119.0 (3) |
|  |  | C90—C89—N16 | 121.2 (3) |
|  |  | C91—C90—C89 | 119.4 (4) |
|  |  | C92—C91—C90 | 120.5 (4) |
|  |  | C91—C92—C93 | 120.3 (4) |
|  |  | C94—C93—C92 | 119.4 (4) |
|  |  | C93—C94—C89 | 120.6 (4) |
|  |  | N17—C95—Ru2 | 175.8 (3) |
|  |  | N18—C96—Ru4 | 170.8 (3) |

**Table S3** Crystal data for complexes **2** and **3**.

|                                                | <b>2</b>                                                              | <b>3</b>                                                         |
|------------------------------------------------|-----------------------------------------------------------------------|------------------------------------------------------------------|
| Chemical Formula                               | $C_{96}H_{76}N_{18}Ru_4 \cdot 2.337(OC_4H_{10}) \cdot 0.824(OC_4H_8)$ | $2(C_{51}H_{41}N_9Ru_2) \cdot C_5H_{12} \cdot C_4H_8O_2$         |
| Fw, g/mol                                      | 2118.64                                                               | 2124.38                                                          |
| Crystal System                                 | Monoclinic                                                            | Monoclinic                                                       |
| Space group                                    | $P2_1/c$                                                              | $P2_1/c$                                                         |
| <i>a</i> , Å                                   | 22.2621(10)                                                           | 11.8877(5)                                                       |
| <i>b</i> , Å                                   | 22.2426(9)                                                            | 20.4352(9)                                                       |
| <i>c</i> , Å                                   | 20.7463(9)                                                            | 19.6259(9)                                                       |
| $\alpha$ °                                     | 90                                                                    | 90                                                               |
| $\beta$ °                                      | 109.053(2)                                                            | 101.0991(18)                                                     |
| $\gamma$ °                                     | 90                                                                    | 90                                                               |
| V, Å <sup>3</sup>                              | 9710.1(7)                                                             | 4678.5(4)                                                        |
| Z                                              | 4                                                                     | 2                                                                |
| T, K                                           | 150                                                                   | 150                                                              |
| $\lambda$ , Å                                  | 1.54178                                                               | 0.71073                                                          |
| $\rho_{calcd}$ , g/cm <sup>3</sup>             | 1.449                                                                 | 1.508                                                            |
| $\mu$ (mm <sup>-1</sup> )                      | 5.43                                                                  | 0.70                                                             |
| F(000)                                         | 4340                                                                  | 2172                                                             |
| Crystal size (mm <sup>3</sup> )                | 0.29 x 0.20 x 0.17                                                    | 0.62 x 0.22 x 0.18                                               |
| Radiation                                      | CuK $\alpha$                                                          | MoK $\alpha$                                                     |
| 2 $\theta$ range (°)                           | 2.1 to 74.7                                                           | 2.3 to 33.2                                                      |
| Index ranges                                   | -25 < <i>h</i> < 27; -27 < <i>k</i> < 27;<br>-25 < <i>l</i> < 25      | -18 < <i>h</i> < 18; -31 < <i>k</i> < 31;<br>-30 < <i>l</i> < 30 |
| Reflections collected                          | 132368                                                                | 233241                                                           |
| Independent reflections                        | 19838                                                                 | 17892                                                            |
| Data/restraints/parameters                     | 19838/786/1427                                                        | 17892/312/765                                                    |
| <i>R</i>                                       | 0.0397                                                                | 0.0292                                                           |
| <i>R<sub>w</sub></i> ( <i>F</i> <sup>2</sup> ) | 0.1063                                                                | 0.0744                                                           |
| Largest diff. peak/hole e Å <sup>-3</sup>      | 0.71, -1.16                                                           | 0.89, -0.82                                                      |

### 3. Electrochemistry details

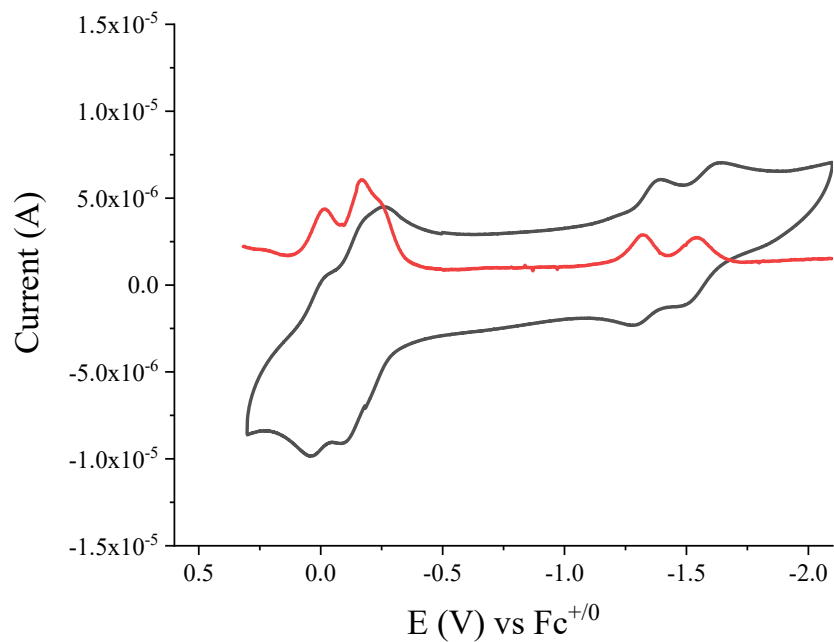

**Fig. S5** Cyclic (black) and differential pulse (red) voltammograms of compound **1** (<1.0 mM) recorded in 0.1 M Bu<sub>4</sub>NPF<sub>6</sub> in THF at a scan rate of 100 mV/s.

**Table S4** Electrochemical data from CV (in V vs. Ag/AgCl).

| Compound                                                                                  | +2/+1  | +1/0   | 0/-1   | -1/-2  |
|-------------------------------------------------------------------------------------------|--------|--------|--------|--------|
| <b>1</b>                                                                                  | -0.010 | -0.131 | -0.839 | -1.068 |
| <b>2</b>                                                                                  | 0.838  | 0.547  | -0.374 | -0.551 |
| <b>3</b>                                                                                  | ----   | 0.741  | -0.385 | ----   |
| *Ru <sub>2</sub> ( <i>ap</i> ) <sub>4</sub> Cl <sup>1</sup>                               | 1.430  | 0.457  | -0.834 | ----   |
| *Ru <sub>2</sub> ( <i>ap</i> ) <sub>4</sub> (C <sub>6</sub> H <sub>5</sub> ) <sup>2</sup> | ----   | 0.100  | -1.160 | ----   |

\*Measurements run in DCM. Compounds **1** – **3** run in THF.

**Table S5** Electrochemical data for **1** and **2**.

| Compound | $\Delta E_{1/2}$ (+1) (mV) | $K_c^a$ | $\Delta E_{1/2}$ (-1) (mV) | $K_c^a$ |
|----------|----------------------------|---------|----------------------------|---------|
| <b>1</b> | 133                        | 179     | 221                        | 5568    |
| <b>2</b> | 291                        | 85,546  | 174                        | 889     |

$$^a K_c = 10^{\Delta E(\text{mV})/59}$$

**Table S6** Summary of optical & electrochemical data of **2** vs  $[\text{Ru}_2(\text{ap})_4]_2(\mu\text{-(C}\equiv\text{C)}_n)$  ( $n = 1, 2$ ).

|                                                      | <b>2</b> | $[\text{Ru}_2(\text{ap})_4]_2(\mu\text{-C}\equiv\text{C})^{15}$ | $[\text{Ru}_2(\text{ap})_4]_2(\mu\text{-(C}\equiv\text{C)}_2)^{15}$ |
|------------------------------------------------------|----------|-----------------------------------------------------------------|---------------------------------------------------------------------|
| $\Delta E_{1/2}$ (+1) (mV)                           | 291      | 280                                                             | 170                                                                 |
| $\Delta E_{1/2}$ (-1) (mV)                           | 174      | 660                                                             | 380                                                                 |
| $\lambda$ IVCT ( $\text{cm}^{-1}$ ) (ox.)            | 4,050    | ----                                                            | 7,700                                                               |
| $\epsilon$ ( $\text{M}^{-1} \text{cm}^{-1}$ ) (ox.)  | 6,860    | ----                                                            | 11,000                                                              |
| $\bar{\nu}_{1/2}$ ( $\text{cm}^{-1}$ ) (ox.)         | 1,716    | ----                                                            | 1,820                                                               |
| Hab ( $\text{cm}^{-1}$ ) (ox.)                       | 647      | ----                                                            | 1,022                                                               |
| $\lambda$ IVCT ( $\text{cm}^{-1}$ ) (red.)           | ----     | ----                                                            | 8,450; 5,670                                                        |
| $\epsilon$ ( $\text{M}^{-1} \text{cm}^{-1}$ ) (red.) | ----     | ----                                                            | 27,000; 7,700                                                       |
| $\bar{\nu}_{1/2}$ ( $\text{cm}^{-1}$ ) (red.)        | ----     | ----                                                            | 1,820; 1,630                                                        |
| Hab ( $\text{cm}^{-1}$ ) (red.)                      | ----     | ----                                                            | 1,678; 694                                                          |
| Ru–Ru ( $\text{\AA}$ ) Avg.                          | 2.486[4] | ----                                                            | 2.332[2]                                                            |

**4. Absorption Details**

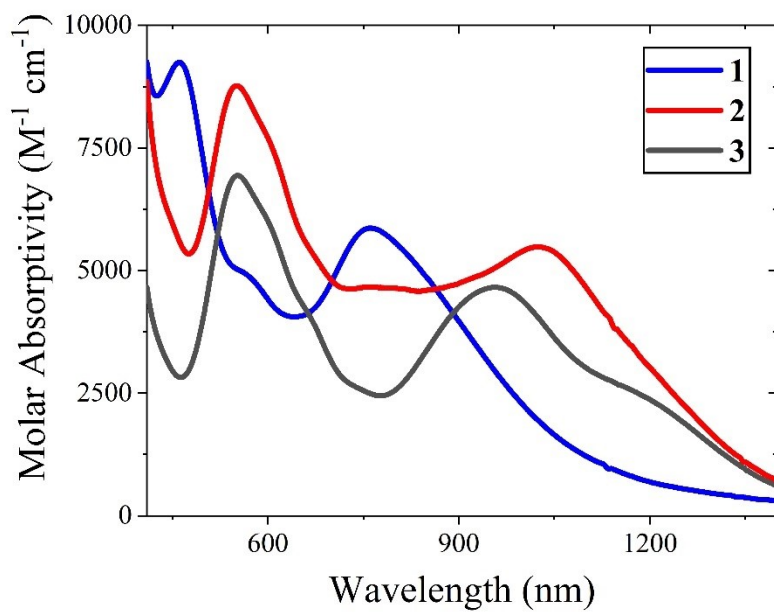

**Fig. S6** Vis-NIR absorption of **1**, **2** and **3** in THF.

## 5. Spectroelectrochemical Vis-NIR spectra of **2**

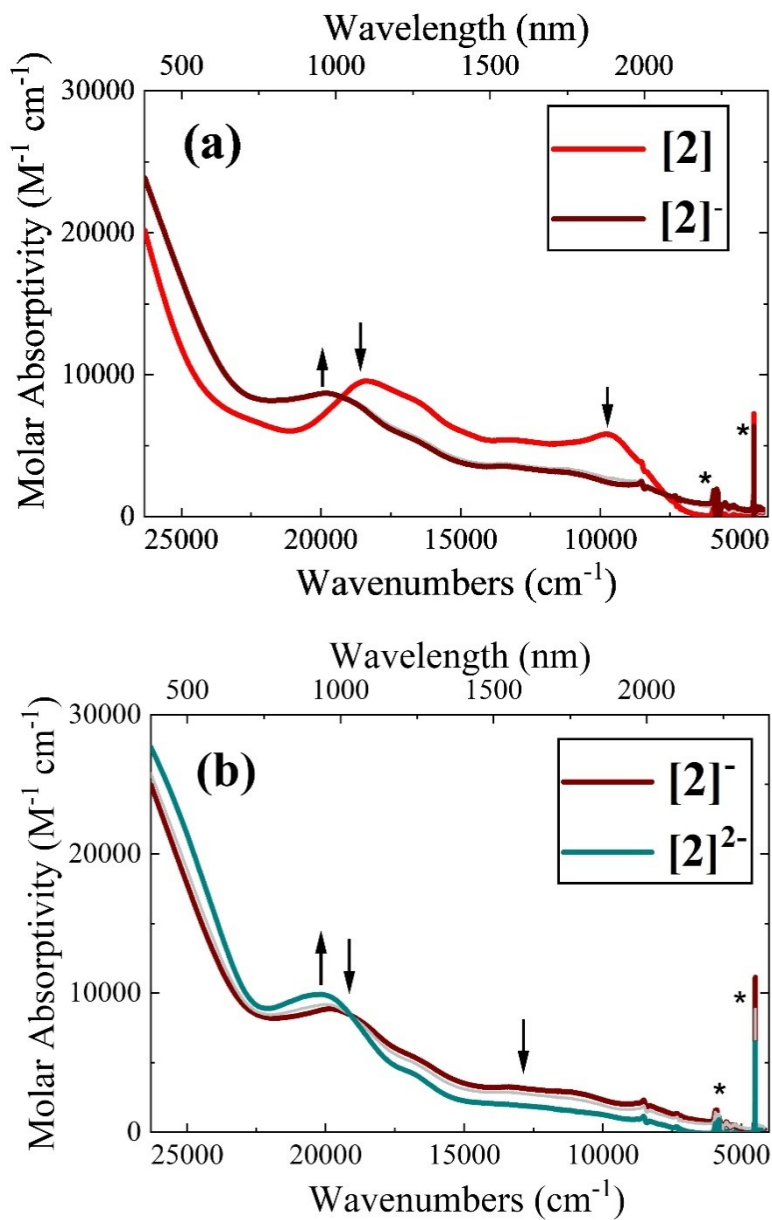

**Fig. S7** Full spectroelectrochemical UV-Vis-NIR changes of **2** at -1.1 V (a) and -1.2 V (b) vs Ag wire. 2 mM analyte with 0.1 M  $[\text{Bu}_4\text{N}][\text{PF}_6]$  in THF in all cases. Instrument artifacts/solvent overtones noted as \*. Isosbestic point located at 1000 nm.

## Peak Analysis

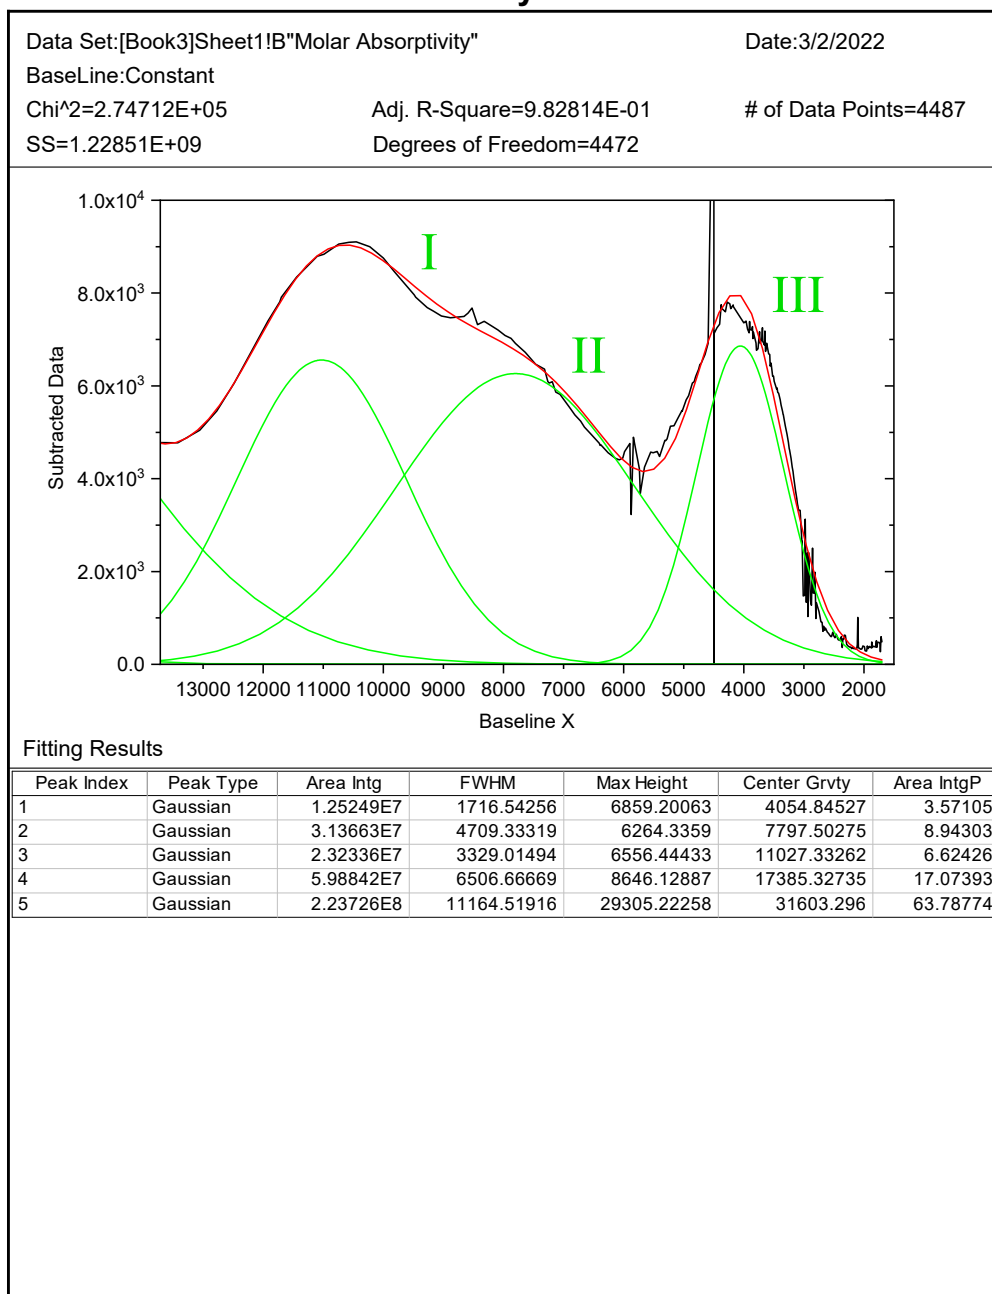

**Fig. S8** Visible-NIR absorption spectrum (black line) of the mixed-valence complex  $[2]^+$  in 0.1 M  $[\text{NBu}_4][\text{PF}_6]$  with additional IR data. Multiple Gaussian bands (green lines) and their sum (red line) to fit the absorption band of  $[2]^+$ . IVCT peak of interest is III; labeled as #1 in peak index.



## Peak Analysis

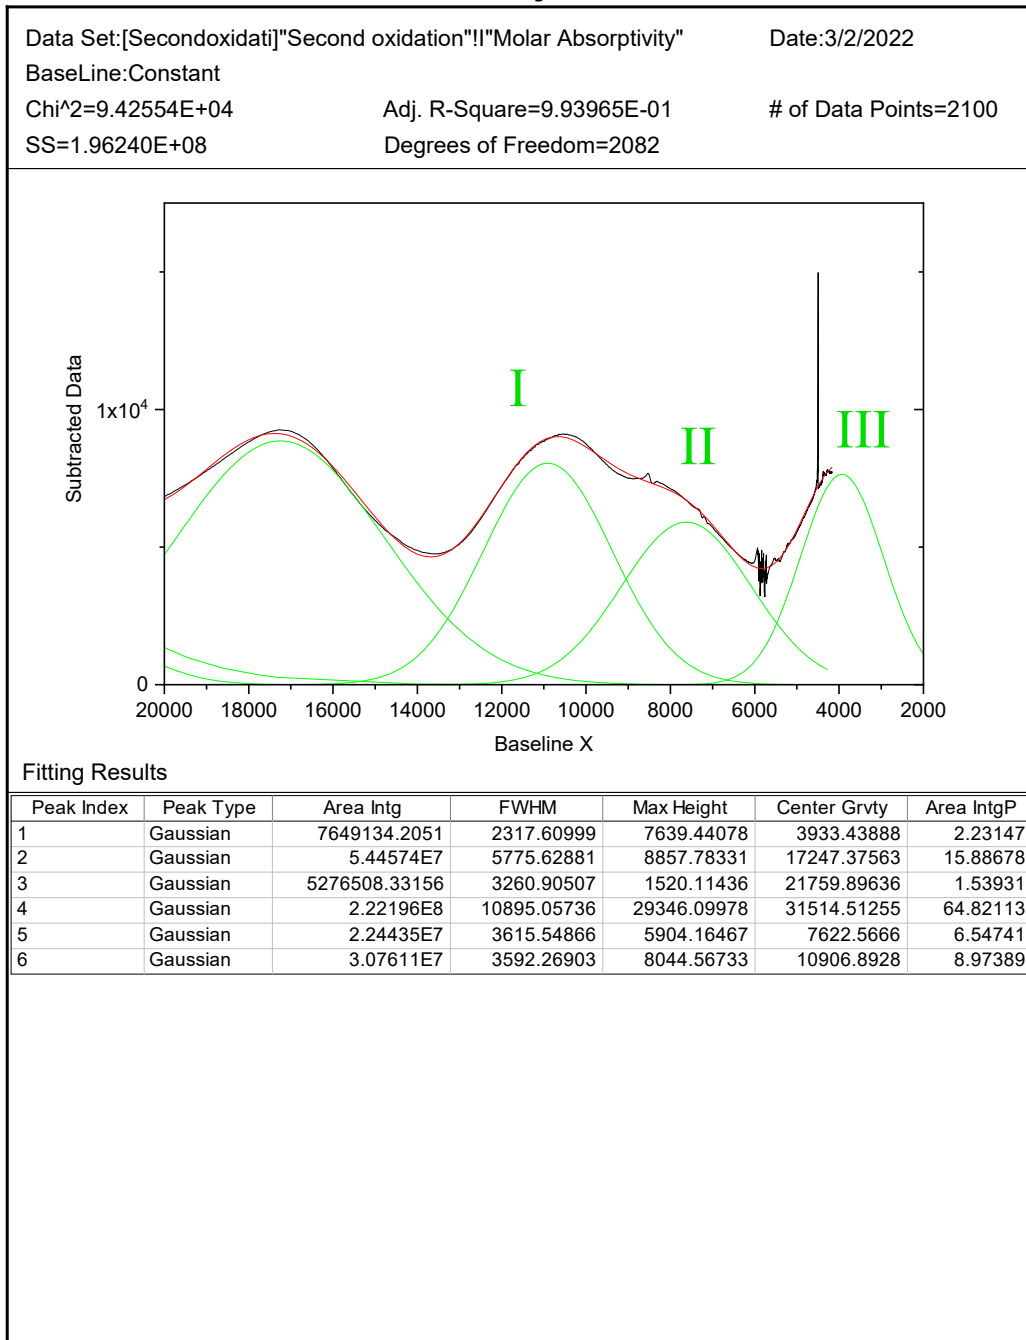

**Fig. S9** Visible-NIR absorption spectrum (black line) of the mixed-valence complex  $[2]^+$  in 0.1 M  $[\text{NBu}_4][\text{PF}_6]$  without IR data. Multiple Gaussian bands (green lines) and their sum (red line) to fit the absorption band of  $[2]^+$ . IVCT peak of interest is peak III; labeled as #1 in peak index.

## Peak Analysis

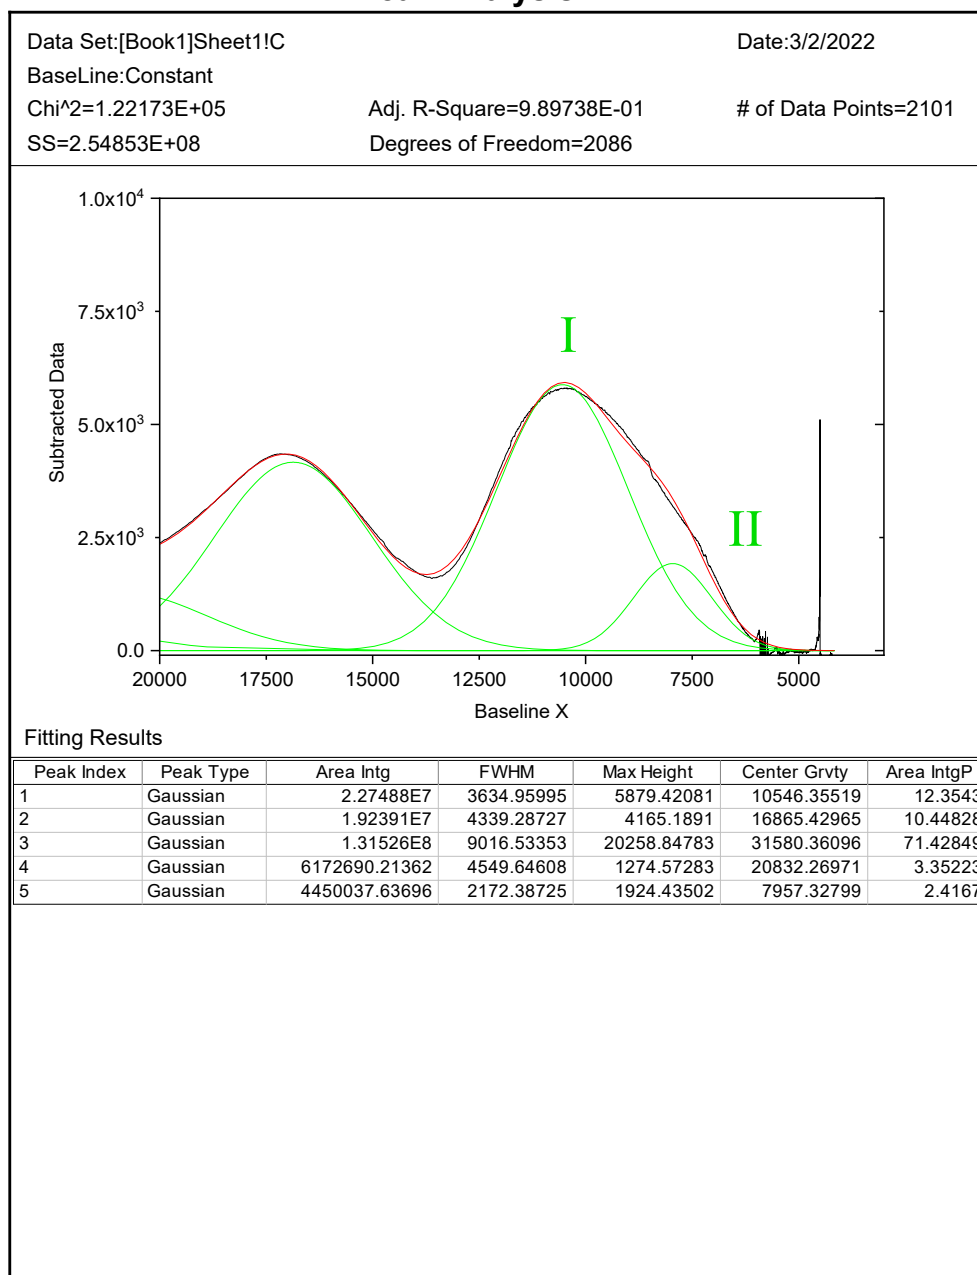

**Fig. S10** Visible-NIR absorption spectrum (black line) of the complex  $[2]^{2+}$  in 0.1 M  $\text{NBu}_4\text{PF}_6$  in THF with IR data. Multiple Gaussian bands (green lines) and their sum (red line) to fit the absorption band of  $[2]^{2+}$ .

## Peak Analysis

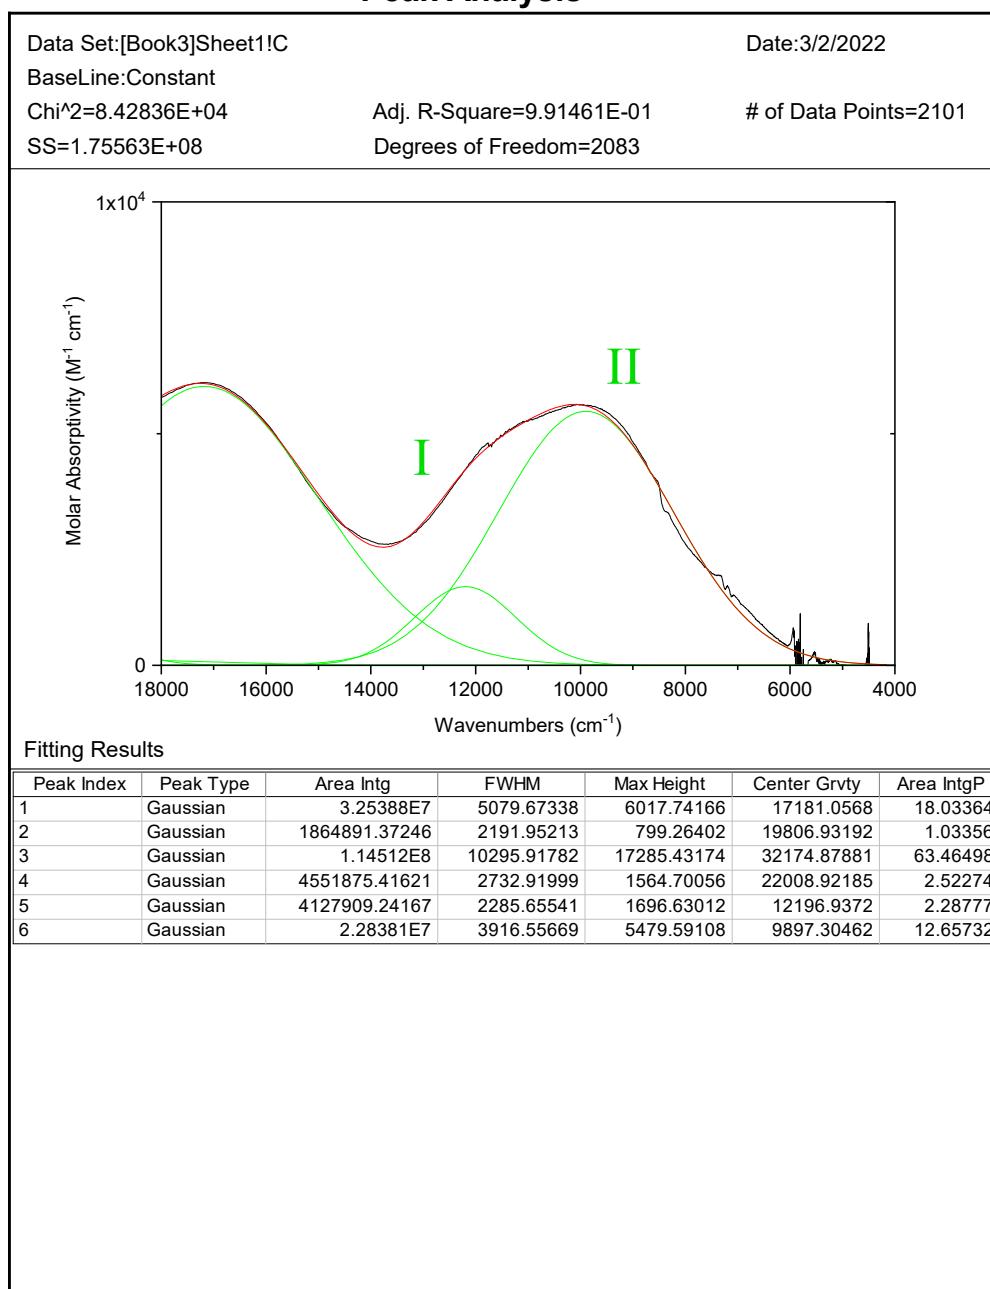

**Fig. S11** Visible-NIR absorption spectrum (black line) of the complex  $[3]^+$  in 0.1 M  $\text{NBu}_4\text{PF}_6$  in THF with IR data. Multiple Gaussian bands (green lines) and their sum (red line) to fit the absorption band of  $[3]^+$ .

Hush Model Analysis (with IR data):

$$\Delta\bar{\nu}_{1/2\text{theor}} = (2310 * \bar{\nu}_{\text{IVCT}})^{0.5}$$

$$\Delta\bar{\nu}_{1/2\text{theor}} = (2310 * 4054)^{0.5} \rightarrow \Delta\bar{\nu}_{1/2\text{theor}} = 3,060 \text{ cm}^{-1} \text{ (experimental: } 1,716 \text{ cm}^{-1}\text{)}$$

$$H_{ab} = (0.0206 / r) * (\bar{\nu}_{\text{IVCT}} * \Delta\bar{\nu}_{1/2\text{exp}} * \epsilon)^{0.5} \text{ ( } r = \text{geometric distance or number of bonds)}$$

$$H_{ab} = (0.0206 / 6.954) * (4054 * 1716 * 6859)^{0.5} \rightarrow H_{ab} = 647.1$$

Hush Model Analysis (w/o IR data):

$$\Delta\bar{\nu}_{1/2\text{theor}} = (2310 * \bar{\nu}_{\text{IVCT}})^{0.5}$$

$$\Delta\bar{\nu}_{1/2\text{theor}} = (2310 * 3933)^{0.5} \rightarrow \Delta\bar{\nu}_{1/2\text{theor}} = 3,014 \text{ cm}^{-1} \text{ (experimental: } 2,316 \text{ cm}^{-1}\text{)}$$

$$H_{ab} = (0.0206 / r) * (\bar{\nu}_{\text{IVCT}} * \Delta\bar{\nu}_{1/2\text{exp}} * \epsilon)^{0.5}$$

$$H_{ab} = (0.0206 / 6.954) * (3933 * 2316 * 7638)^{0.5} \rightarrow H_{ab} = 781.6$$

## 6. Spectroelectrochemical IR changes of **2**

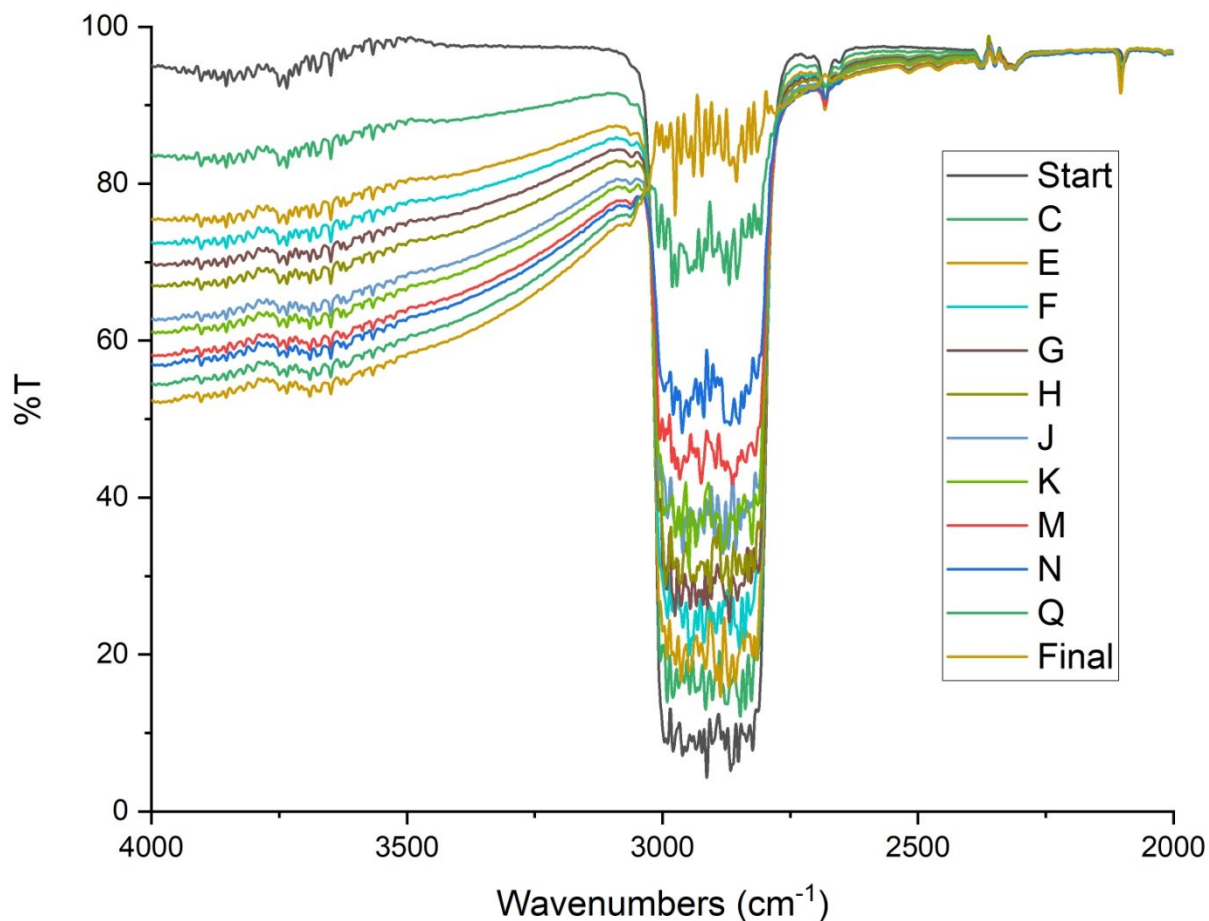

**Fig. S12** Full FT-IR spectroelectrochemistry of **2** at 0.1 V vs Ag wire. 2 mM analyte with 0.1 M [Bu<sub>4</sub>N][PF<sub>6</sub>] in THF in all cases. Upon application of the potential, general absorption from 4,000 cm<sup>-1</sup> to *ca.* 2,500 cm<sup>-1</sup> is observed. This was determined not to be shifting of the baseline absorption as the area around  $\bar{\nu}$  (C≡N) does not experience the same large shifts (see Fig. S13 below). Conversion from %T to absorbance then absorbance values to molar absorptivity values was done to generate the ‘missing’ half of the IVCT band in the spectra of [2]<sup>+</sup>.

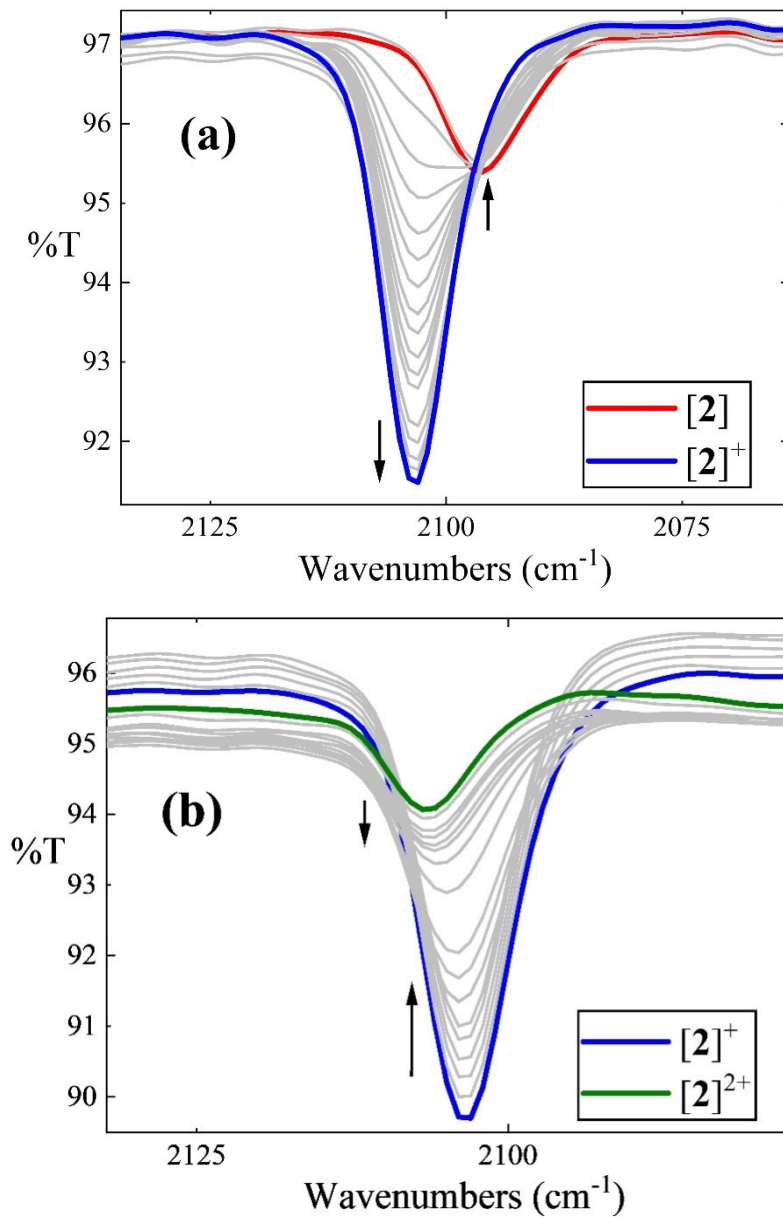

**Fig. S13** FT-IR spectroelectrochemistry of **2** at 0.1 V (a) and 0.3-0.4 V (b) vs Ag wire. 2 mM analyte with 0.1 M [Bu<sub>4</sub>N][PF<sub>6</sub>] in THF in all cases.

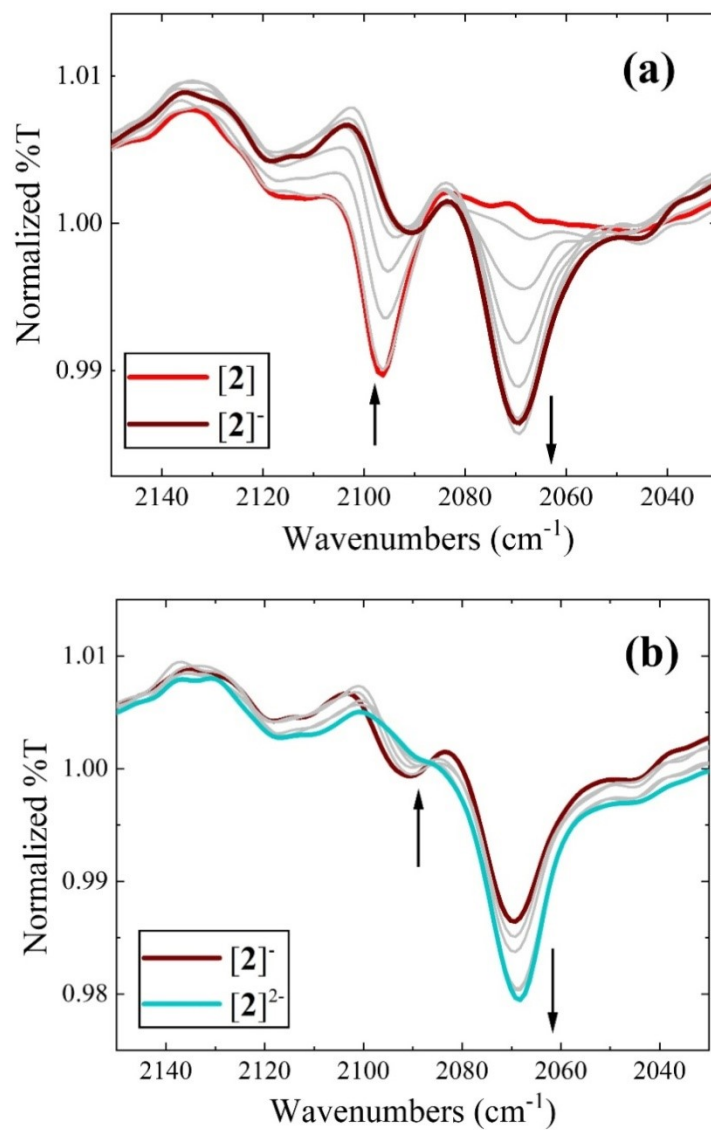

**Fig. S14** FT-IR spectroelectrochemistry of **2** at  $-1.1$  V (a) and  $-1.35$  V (b) vs Ag wire. 2 mM analyte with 0.1 M  $[\text{Bu}_4\text{N}][\text{PF}_6]$  in THF in all cases.

**Table S7**  $\bar{\nu}(\text{C}\equiv\text{N})$  of  $[\mathbf{2}]^n/[\mathbf{2}]^{n+}$  ( $n = 1,2$ ) and  $[\mathbf{3}]^{+/-}$ .

| ( $\text{cm}^{-1}$ )                | $[\mathbf{2}]^{2+}$ | $[\mathbf{2}]^+$ | <b>2</b> | $[\mathbf{2}]^-$ | $[\mathbf{2}]^{2-}$ | $[\mathbf{3}]^+$ | <b>3</b> | $[\mathbf{3}]^-$ |
|-------------------------------------|---------------------|------------------|----------|------------------|---------------------|------------------|----------|------------------|
| $\bar{\nu}(\text{C}\equiv\text{N})$ | 2107                | 2103             | 2096     | 2092, 2069       | 2068                | 2119             | 2096     | 2070             |

## 7. Spectroelectrochemical UV-Vis-NIR spectra of [3]<sup>-</sup>

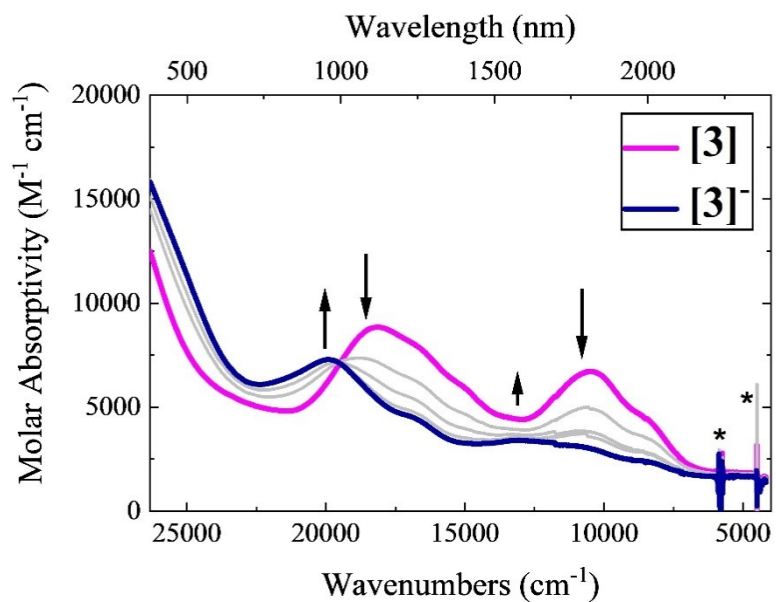

**Fig. S15** Spectroelectrochemistry Vis-NIR of **3** at -1.15 V in THF vs Ag wire. 2 mM analyte with 0.1 M [Bu<sub>4</sub>N][PF<sub>6</sub>] in THF. Instrument artifacts/solvent overtones noted as \*.



## 8. Spectroelectrochemical IR changes of **3**

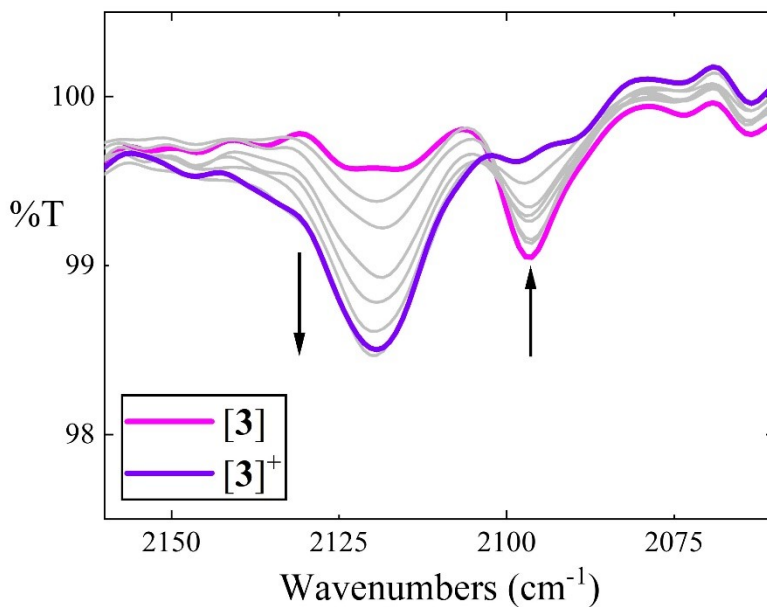

**Fig. S16** FT-IR spectroelectrochemistry of **3** at 0.4 V vs Ag wire. 2 mM analyte with 0.1 M [Bu<sub>4</sub>N][PF<sub>6</sub>] in THF.

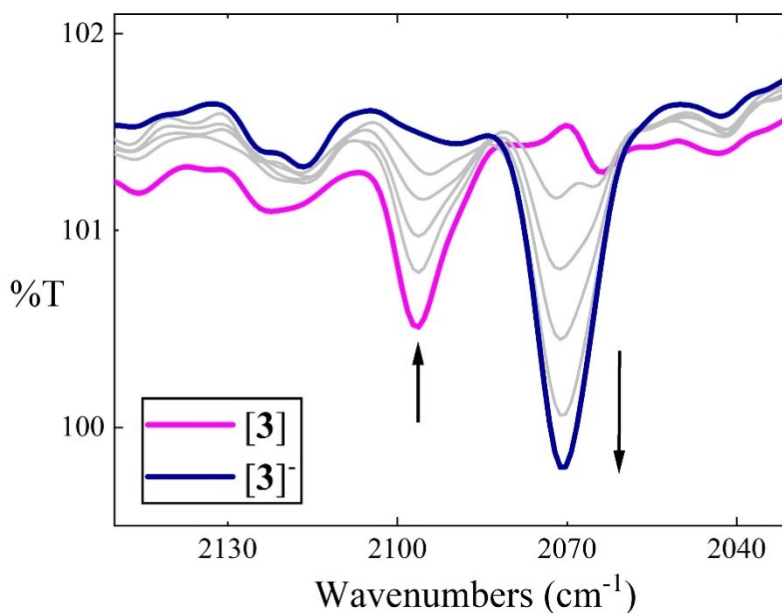

**Fig. S17** FT-IR spectroelectrochemistry of **3** at -1.15 V vs Ag wire. 2 mM analyte with 0.1 M [Bu<sub>4</sub>N][PF<sub>6</sub>] in THF.

## 9. $^1\text{H}$ NMR of **2** and **3**

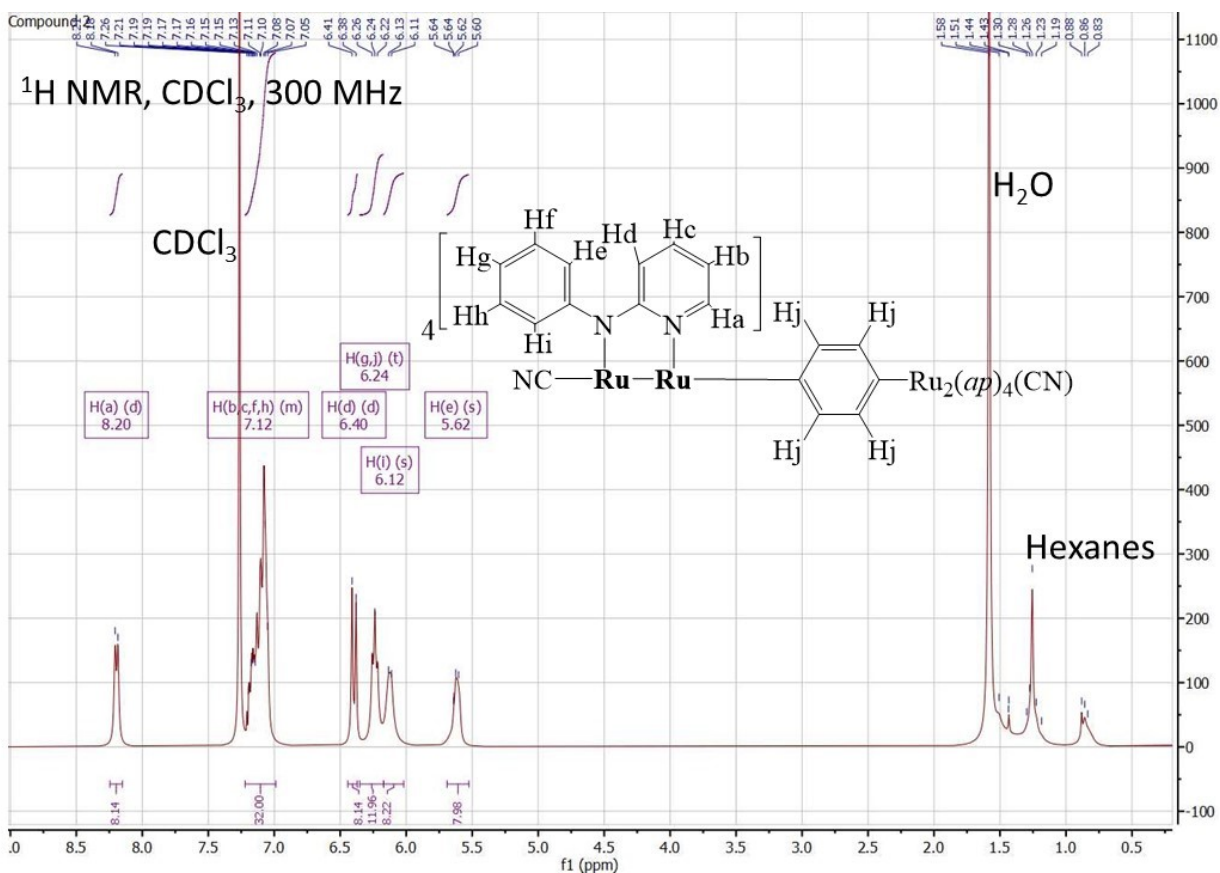

**Fig. S18**  $^1\text{H}$  NMR of **2** in  $\text{CDCl}_3$  at 293 K. The phenyl protons H<sub>j</sub> are assigned to the triplet at 6.24 ppm as we are unable to determine if the expected singlet for H<sub>j</sub> is overlapped by the expected triplet for H<sub>g</sub>. These protons are shifted from **3**, but since all four protons of the phenyl are near  $\text{Ru}_2$  atoms, all would be shifted to lower ppm. The remaining *ap*-based peaks match well with the assignments for **3** in **Fig. S19**.

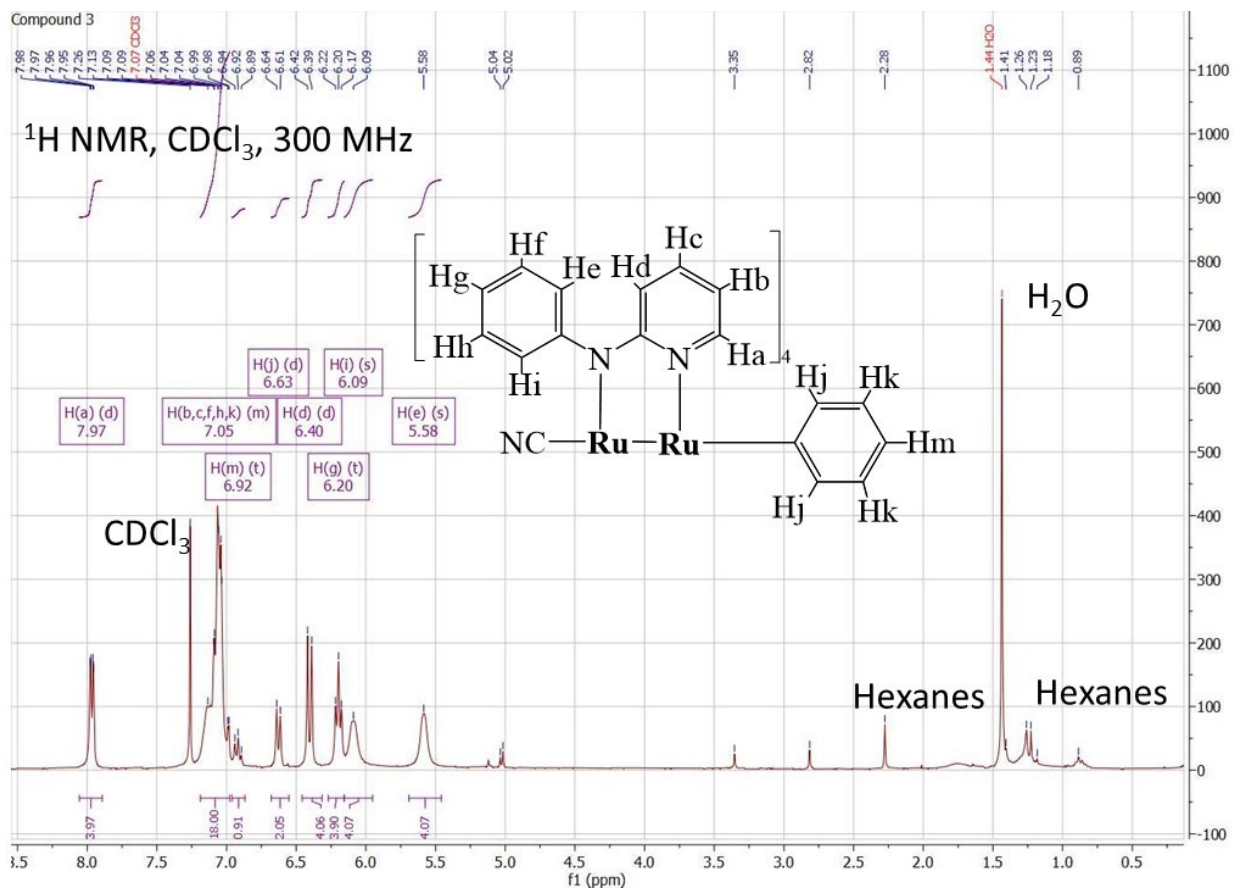

**Fig. S19**  $^1\text{H}$  NMR of **3** in  $\text{CDCl}_3$  at 293 K. For the phenyl proton assignments, the peak Hm is almost overlapping with the multiplet, suggesting that Hk would be nearby. Hj would be shifted upfield due to closeness to the  $\text{Ru}_2$  atoms. The remaining *ap*-based protons are assigned due to expected symmetry and comparisons to the base molecules, pyridine and aniline.

## 10. Room Temperature Magnetism Measurements of 1 – 3

**Table S8** Room temperature magnetism data reported as per compound (Evans method<sup>5</sup>).  
Solvent: CDCl<sub>3</sub>, Reference: Ferrocene

| Compound | $\Delta\delta$ (Hz) | [Ru <sub>2</sub> ] (mM) | $\chi_m$ (emu/mol) | $\mu_{\text{eff}}$ (B.M.)<br>(per compound) |
|----------|---------------------|-------------------------|--------------------|---------------------------------------------|
| <b>1</b> | 36.6                | 2.18x10 <sup>-3</sup>   | 0.01336            | 5.81                                        |
| <b>2</b> | 2.04                | 1.59x10 <sup>-3</sup>   | 0.00105            | 2.18                                        |
| <b>3</b> | 9                   | 4.25x10 <sup>-3</sup>   | 0.00218            | 2.26                                        |

Compound **1** was predicted to contain 6 unpaired electrons (two Ru<sub>2</sub>(II,III) centers). The experimentally determined  $\mu_{\text{eff}}$  is slightly lower than expected and is attributed to some degradation of **1** back to either Ru<sub>2</sub>(*ap*)<sub>4</sub>Cl or Ru<sub>2</sub>(*ap*)<sub>4</sub>(C<sub>6</sub>H<sub>5</sub>) in the presence of CDCl<sub>3</sub> during prep and running of the spectra. Both Ru<sub>2</sub>(*ap*)<sub>4</sub>Cl and Ru<sub>2</sub>(*ap*)<sub>4</sub>(C<sub>6</sub>H<sub>5</sub>) have a  $\mu_{\text{eff}}$  *ca.* 3.8 (3 unpaired electrons).<sup>1,2</sup>

**Table S9** Solid state magnetism of **3** with diamagnetic corrections.

| Avg. $\chi_g$ (emu/mol) | Avg. $\chi_m$ (emu/mol) | Avg. $\mu_{\text{eff}}$ (B.M.) |
|-------------------------|-------------------------|--------------------------------|
| 9.41x10 <sup>-7</sup>   | 9.25x10 <sup>-3</sup>   | 1.83                           |

## 11. Computational details

Ground state DFT calculations were performed using Gaussian 16 version A.03.<sup>16</sup> The B97D3<sup>17,18</sup> and B3LYP<sup>19-22</sup> functionals were found suitable for geometry optimizations, single point energy calculations and frequency analyses. While B97D3 accurately reproduced the crystal structure metrical parameters and vibrational frequencies, B3LYP was found to be better for energies. The xyz coordinates for the initial geometries were obtained from the respective crystal structures of the compounds. Minima at the optimized geometries were confirmed through vibrational frequency analyses. For **3**, The def2tzvp basis set was employed for Ru (with ECP), N, C<sub>phenylene</sub> and C<sub>CN</sub> atoms and the def2svp for all others.<sup>23,24</sup> For **2**, de2tzvp was employed for Ru (with ECP) and N and def2svp for all other atoms. Grimme's D3 dispersion correction was used with the B3LYP functional. In both cases, geometry optimizations were carried out for both the S = 0 and S = 1 states. Wavefunction stability analysis was carried out for the closed-shell and open shell singlet calculations, by mixing the HOMO and LUMO orbitals, and using the stable=opt keyword as implemented in Gaussian16 rev A.03. A broken symmetry singlet was not encountered. For **3**, both B97D3 and B3LYP predict the singlet to be lower in energy than the triplet by 4.9 kcal/mol and 2.0 kcal/mol respectively. For **2**, the singlet was found to be more stable by 2.5 kcal/mol and 0.87 kcal/mol using the B97D3 and B3LYP functional, respectively. These low energy barriers are scaled easily at room temperature, which could be the reason for non-zero magnetic moments. DFT methods are known to carry intrinsic errors for energies, so we acknowledge that for these molecules whose energy differences appear to be < 3 – 5 kcal/mol, the ground state may have multireference character. However, such calculations are outside the scope of this communication. Looking forward, variable temperature

NMR can be utilized to experimentally determine this value, providing a reference point for future studies.

For the oxidized species  $[2]^+$ , we hypothesize that it may not matter whether we start from a singlet or triplet state of **2**, for we end up with a doublet for  $[2]^+$  in either case. DFT calculations carried out (see below) with a spin of  $S = \frac{1}{2}$  for  $[2]^+$  agree well with spectroelectrochemical observations. For  $[2]^+$ , the optimized geometry of  $2_{S=0}$  was taken as the input geometry, and a geometry optimization and frequency analysis was carried out at the B97D3 level in the doublet state. TDDFT<sup>25-29</sup> calculations were done using the B3LYP functional, CPCM solvation model<sup>30</sup> (THF) and Grimme's D3 dispersion correction. 50 excited states were calculated, but an intense low-energy transition was observed as the 5<sup>th</sup> excited state. So, 'functional screening' was done with 7 excited states in the interest of saving computational cost and time. Other functionals like CAM-B3LYP,<sup>31</sup> M06,<sup>32</sup> and M06L<sup>33</sup> gave comparable or much worse accuracy compared to B3LYP. Natural transition orbital analysis was done using the method of Martin.<sup>34</sup>

**Table S10** Selected bond metrics for the DFT-optimized structure of **2**, vs experimental values.\*

| Bond metrics,<br>$\text{\AA}/^\circ$ | Expt, <b>2</b>       | <b>2 B97D3</b> |              | <b>2 B3LYP</b> |                  |
|--------------------------------------|----------------------|----------------|--------------|----------------|------------------|
|                                      |                      | <b>S = 0</b>   | <b>S = 1</b> | <b>S = 0</b>   | <b>S = 1</b>     |
| <b>Ru-Ru</b>                         | 2.4892(7), 2.4829(5) | 2.49444        | 2.46186      | 2.52986        | 2.5306, 2.4362   |
| <b>Ru-C<sub>aryl</sub></b>           | 2.052(3), 2.051(3)   | 2.020915       | 2.00454      | 2.06045        | 2.0488, 2.0639   |
| <b>Ru-C<sub>CN</sub></b>             | 2.019(4), 2.013(3)   | 1.977115       | 1.97057      | 1.99883        | 2.0008           |
| <b>C<math>\equiv</math>N</b>         | 1.140(5), 1.143(4)   | 1.17343        | 1.17945      | 1.16177        | 1.16151          |
| <b>Ru-Ru-C<sub>aryl</sub></b>        | 152.2(1), 147.1(1)   | 153.2346       | 154.4704     | 154.5895       | 154.249, 157.049 |
| <b>Ru-Ru-C<sub>CN</sub></b>          | 168.0(1), 170.6(1)   | 167.2827       | 167.1395     | 166.7488       | 166.0565         |

|                               |      |         |     |         |                  |
|-------------------------------|------|---------|-----|---------|------------------|
| $\nu(\text{C}\equiv\text{N})$ | 2096 | 2101.43 | DNC | 2204.34 | 2201.26, 2205.78 |
|-------------------------------|------|---------|-----|---------|------------------|

\*All values are averages, unless there is a significant discrepancy in the two 'halves' of the molecule, in which case two values are reported. DNC = Calculation did not converge.

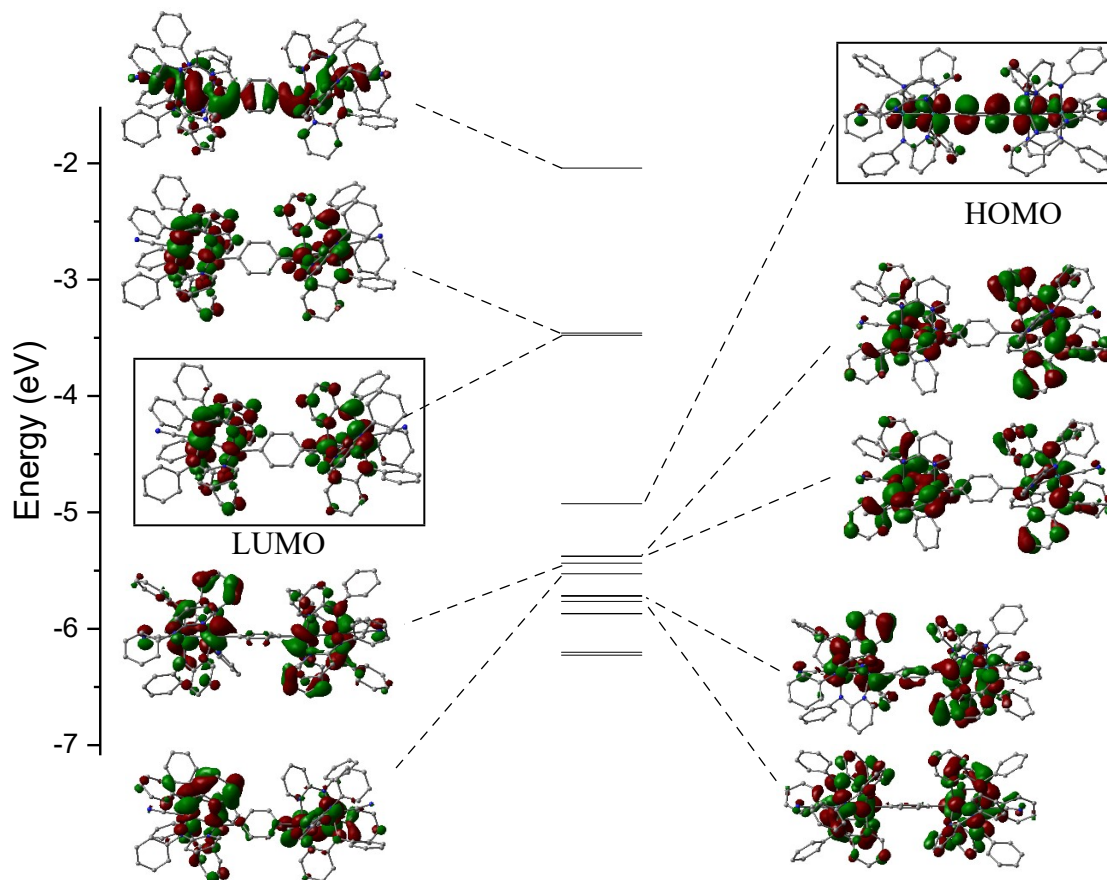

**Fig. S20** Frontier  $\alpha$ -spin molecular orbitals of **2**,  $S = 0$ , plotted  $|\text{Isovalue}| = 0.025$ .

Note about electronic configurations:

Note that for simplicity, the electronic configuration of  $(\text{Y})\text{Ru}_2(\text{ap})_4(\text{C}_6\text{H}_4\text{-4-NMe}_2)$  ( $\text{Y} = \text{CN}, \text{CO}$ ) is denoted as " $\pi^4\delta^2(\pi^*)^4$ " ( $\text{CN}$ ) or " $\pi^4\delta^2(\pi^*)^4\delta^*$ " ( $\text{CO}$ ). This does not reflect the true energetic ordering of the MOs. It is easy to see that the  $\pi/\pi^*(\text{Ru-Ru})$  orbitals are not identical. One set is perpendicular to the plane of the axial aryl, thereby interacting with its  $\pi/\pi^*$  set. The other set of  $\pi/\pi^*(\text{Ru-Ru})$  orbitals, being parallel to the plane of the aryl ligand, does not interact in this fashion.

When all the orbital contributions are summed up, we can indeed condense the representation of the valence d-manifold of the Ru-Ru motif in this way for convenience and d-electron counting purposes.

Unfortunately, assignments of individual MOs are further complicated by the large structural deviations from idealized mono-axial/bis-axial paddlewheel structures observed in **2** and **3**, which result in extensive mixing among the fragment orbitals (see **Table S13**).



**Table S11** Selected molecular orbitals of **2** ( $S = 0$  state) (see **Fig S20** for orbital energies)

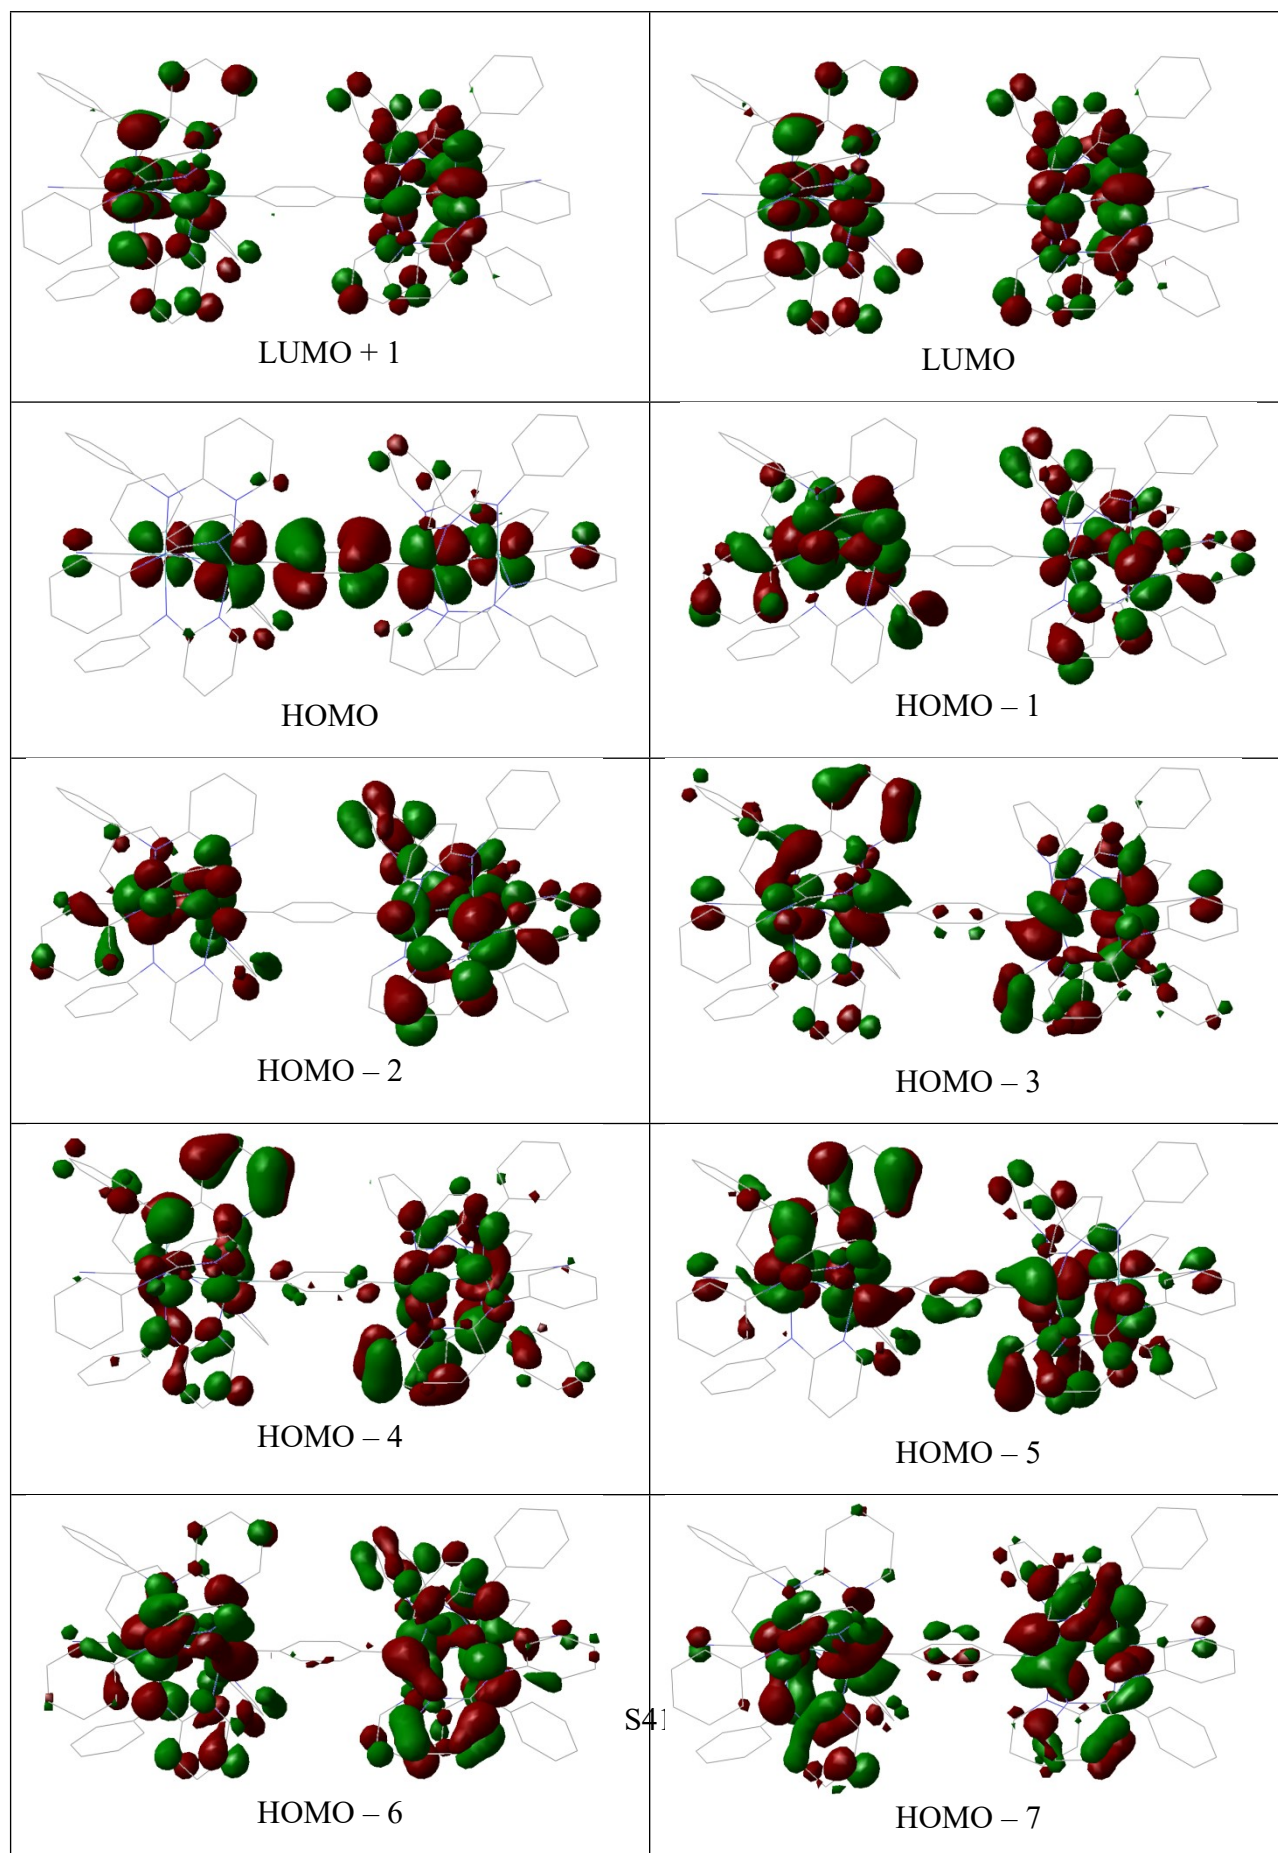

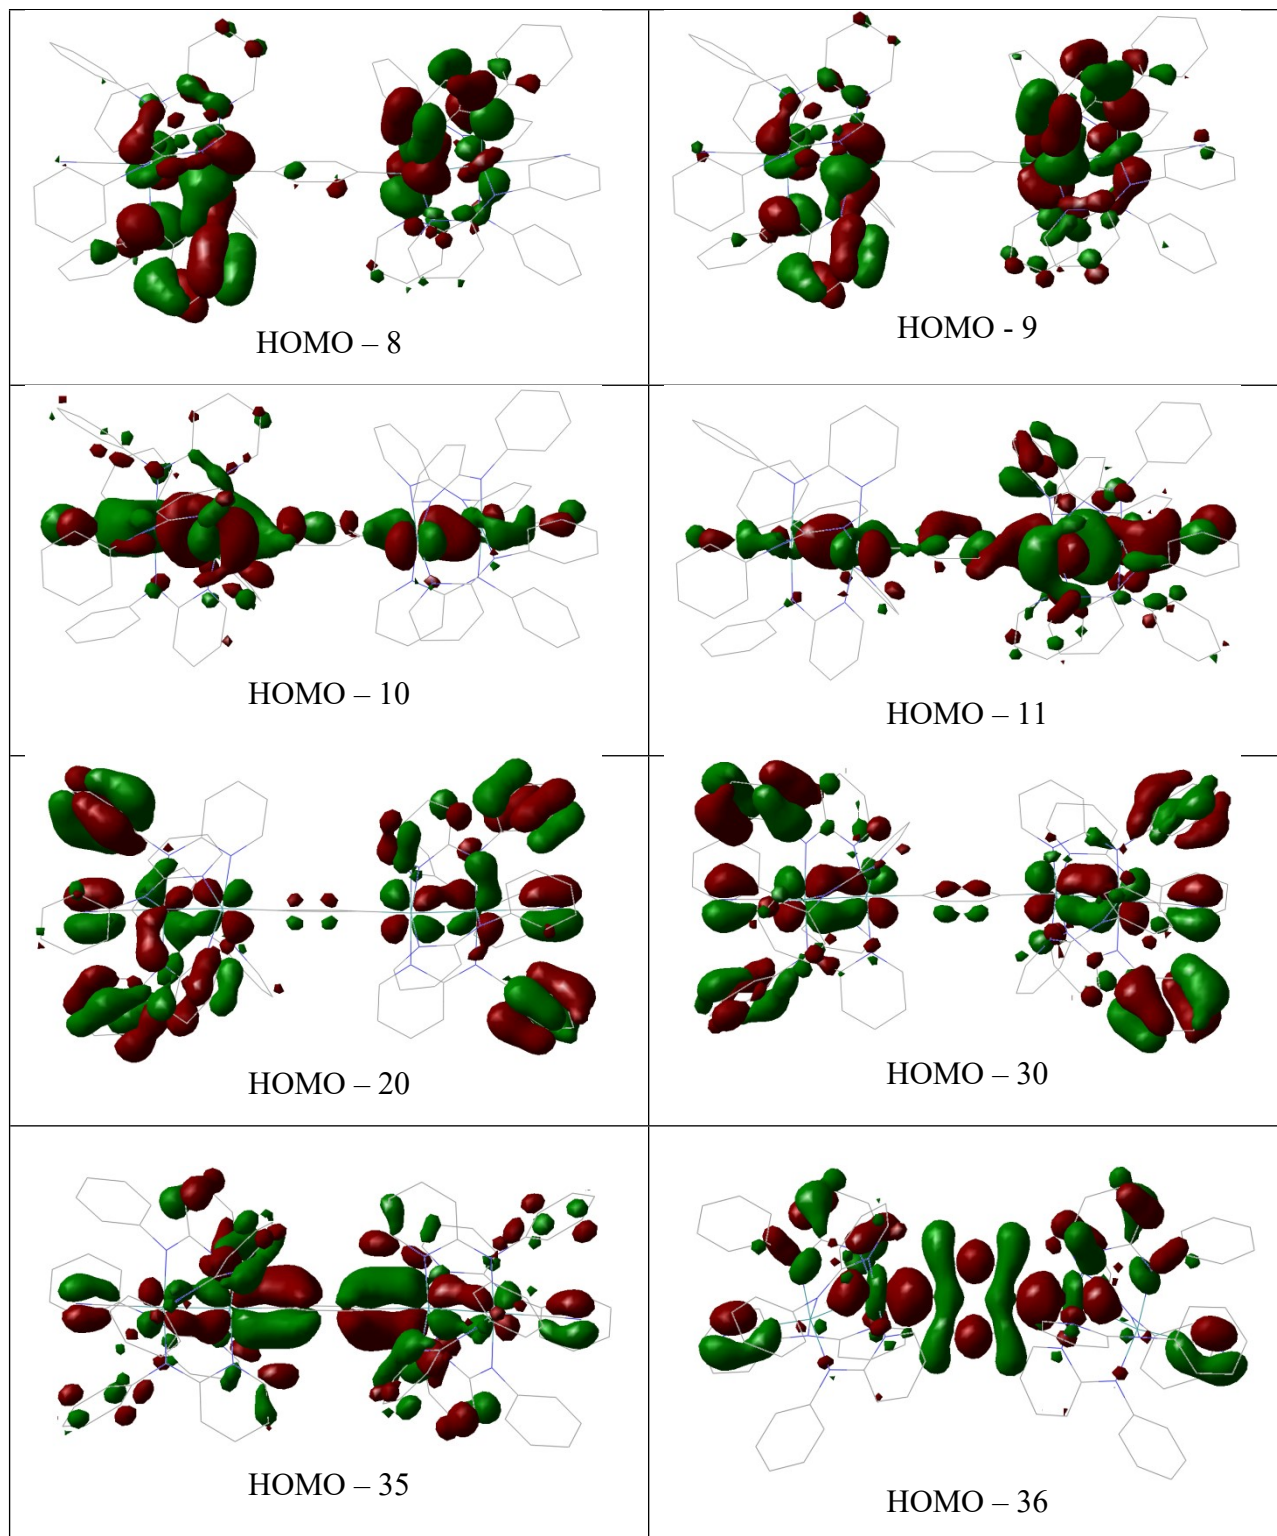

**Table S12** Frontier molecular orbitals for **2** with respective orbital compositions (minor contributions < 5% not included).\*†

| Molecular orbital | Assignment                                       | % Contribution                         |
|-------------------|--------------------------------------------------|----------------------------------------|
| HOMO              | $\pi^*(\text{Ru}_2) + \pi(\text{C}_6\text{H}_4)$ | $d_{yz}(\text{Ru1} + \text{Ru3})$ 44.3 |
|                   | or                                               | $p_\pi(\text{C}_6\text{H}_4)$ 25.3     |
|                   | $\pi^*(\text{Ru-C}_{\text{aryl}})$               | $d_{yz}(\text{Ru2} + \text{Ru4})$ 11.2 |
| LUMO              | $\delta^*(\text{Ru}_2)$                          | $d_{xy}(\text{Ru2} + \text{Ru4})$ 27.9 |
|                   |                                                  | $p_{\text{N}}$ 13.1                    |
|                   |                                                  | Minor (Ru1 + Ru3) 6.8                  |

\*Atom labels are according to Figure 1. † The phenylene moiety lies on the xz plane. z axis and Ru-Ru bond are collinear

**Table S13** Some frontier molecular orbitals and % atomic/fragment orbital contributions.

| MO        | % Ru contribution (Ru-Ru fragment orbitals) †                                            | % phenylene contribution |
|-----------|------------------------------------------------------------------------------------------|--------------------------|
| LUMO + 1  | 49.64 ( $\delta^*(\text{Ru}_2)$ )                                                        | 1.13                     |
| LUMO      | 48.75 ( $\delta^*(\text{Ru}_2)$ )                                                        | 0.49                     |
| HOMO      | 62.10 ( $\pi_{yz}^*(\text{Ru}_2)$ )                                                      | 25.86 (only $2p_y$ )     |
| HOMO – 1  | 21.36 (mix, Ru1 and Ru3: $d_{yz}+d_{xz}$ ; Ru2 and Ru4: $d_{z^2} + d_{xz}$ )             | 0.74                     |
| HOMO – 2  | 23.27 (mix, Ru1 and Ru3: $d_{x^2-y^2}+d_{xz}$ ; Ru2 and Ru4: $d_{z^2} + d_{xz}$ )        | 0.95                     |
| HOMO – 3  | 53.06 ( $\pi_{yz}^*(\text{Ru}_2)$ )                                                      | 1.54                     |
| HOMO – 4  | 24.27 (Mix; major $d_{x^2-y^2}$ )                                                        | 2.43                     |
| HOMO – 5  | 29.98 (mix, Ru1 and Ru3: $d_{yz}+d_{xz}$ ; Ru2 and Ru4: $d_{z^2} + d_{xy}$ )             | 2.81                     |
| HOMO – 6  | 23.48 (mix, Ru1 and Ru3: $d_{x^2-y^2}+d_{z^2}+d_{xz}$ ; Ru2 and Ru4: $d_{yz} + d_{xy}$ ) | 0.93                     |
| HOMO – 7  | 50.54 ( $\pi_{yz}^*(\text{Ru}_2)$ )                                                      | 2.64                     |
| HOMO – 8  | 41.91 ( $\delta(\text{Ru}_2)$ )                                                          | 1.26                     |
| HOMO – 9  | 49.05 ( $\delta(\text{Ru}_2)$ )                                                          | 0.82                     |
| HOMO – 10 | 56.94 ( $\pi_{xz}^*(\text{Ru}_2)$ )                                                      | 4.29                     |
| HOMO – 11 | 55.37 ( $\pi_{xz}^*(\text{Ru}_2)$ )                                                      | 5.98                     |
| HOMO – 20 | 18.89 ( $\pi_{yz}(\text{Ru}_2) - \pi(\text{CN})$ )                                       | 0.20                     |
| HOMO – 30 | 30.72 ( $\pi_{yz}(\text{Ru}_2) - \pi(\text{CN})$ )                                       | 2.4                      |
| HOMO – 35 | 29.10 ( $\pi_{yz}(\text{Ru-C})$ )                                                        | 26.1                     |
| HOMO – 36 | 23.30 ( $\sigma(\text{Ru-C})$ )                                                          | 26.2                     |

† Where assignments of the Ru-Ru d-manifold could not be discerned due to extensive mixing, the component d-orbitals are listed.

Among the frontier MOs listed above, the one with significant phenylene contribution is the HOMO (and LUMO + 2, but LUMO + 2 consists only of  $C_{\text{phenylene}} 2s$  and  $2p_z$  orbitals whereas

HOMO consists only of  $C_{\text{phenylene}} 2p_y$  orbitals). The phenylene ring is parallel to the  $xz$  plane. This, along with the large energy gap ( $>3$  eV) between HOMO and LUMO + 2 of **2** strengthens our argument that the SOMO of  $[2]^+$  (aka HOMO of **2**) is involved in the low-energy IVCT transition.

**Table S14** Selected bond metrics for the DFT-optimized structure of **3**, vs experimental values.

|                                                 | Expt, <b>3</b> | <b>3 B97D3</b> |              | <b>3 B3LYP</b> |              |
|-------------------------------------------------|----------------|----------------|--------------|----------------|--------------|
|                                                 |                | <b>S = 0</b>   | <b>S = 1</b> | <b>S = 0</b>   | <b>S = 1</b> |
| <b>Ru-Ru</b>                                    | 2.5011(6)      | 2.50495        | 2.41004      | 2.52001        | 2.42176      |
| <b>Ru-C<sub>aryl</sub></b>                      | 2.052(2)       | 2.02367        | 2.04369      | 2.03573        | 2.04837      |
| <b>Ru-C<sub>CN</sub></b>                        | 2.008(2)       | 1.97202        | 2.00320      | 1.99359        | 2.00495      |
| <b>C<math>\equiv</math>N</b>                    | 1.156(2)       | 1.17310        | 1.17129      | 1.16908        | 1.16809      |
| <b>Ru-Ru-C<sub>aryl</sub></b>                   | 156.26(5)      | 152.36105      | 153.08416    | 153.23693      | 155.12857    |
| <b>Ru-Ru-C<sub>CN</sub></b>                     | 170.88(5)      | 168.01125      | 167.38325    | 167.99598      | 167.18985    |
| <b><math>\nu(\text{C}\equiv\text{N})</math></b> | 2089           | 2090.36        | DNC          | 2224.79        | 2223.50      |

DNC = Calculation did not converge

**Table S15** Selected bond metrics for the DFT-optimized structure of  $[2]^+$ .

|                              | <b>B97D3</b> | <b>B3LYP</b> |
|------------------------------|--------------|--------------|
| <b>Ru-Ru</b>                 | 2.46636      | 2.51132      |
| <b>Ru-C<sub>aryl</sub></b>   | 2.00740      | 1.97618      |
| <b>Ru-C<sub>CN</sub></b>     | 1.97741      | 1.99719      |
| <b>C<math>\equiv</math>N</b> | 1.17227      | 1.16171      |

|                               |           |           |
|-------------------------------|-----------|-----------|
| <b>Ru-Ru-C<sub>aryl</sub></b> | 153.85443 | 153.16124 |
| <b>Ru-Ru-C<sub>CN</sub></b>   | 174.17953 | 167.9283  |

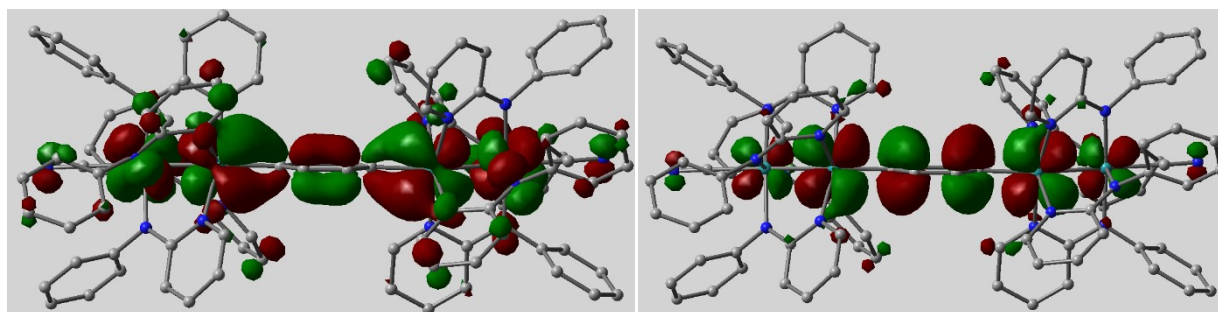

**Fig. S21** Natural transition donor (left) and acceptor (right) orbitals corresponding to the IVCT band, extracted from excited state #5 of  $[2]^+$ . Experimental (Figs. 3a and S7) *ca.*  $4000\text{ cm}^{-1}$ , Calculated (Fig. S22)  $4647.1\text{ cm}^{-1}$ .  $|\text{Isovalue}| = 0.025$ .

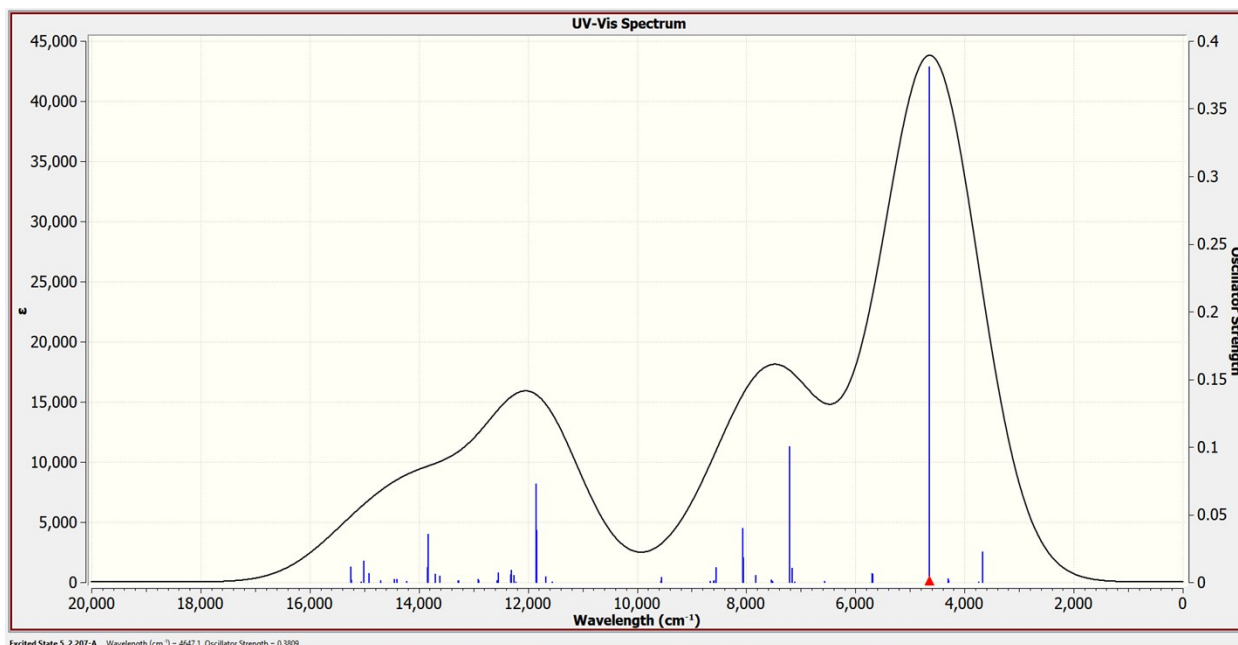

**Fig. S22** TD-DFT calculated electronic absorption spectrum of  $[2]^+$ .

**Table S16** xyz coordinates for **2**, S=0, B97D3

Ru 3.46416320 -0.70150710 -0.08499282  
Ru 5.74942995 0.29597953 -0.01261492  
Ru -3.46368952 -0.70440762 0.06324954  
Ru -5.74912774 0.29410794 0.02398292  
N 3.30058933 0.38219815 -1.94821517  
N 5.63027749 0.75910735 -1.94407830  
N 3.97838690 -2.22690676 -1.30519601  
N 6.15616876 -1.76395619 -0.54291308  
N 3.92005764 -1.80603599 1.55944449  
N 5.71449441 -0.33884970 1.94671506  
N 3.24170341 0.91858489 1.34980096  
N 5.08120315 2.08406850 0.51106463  
N -3.23890346 0.96703522 -1.30994670  
N -5.08102317 2.10028036 -0.43339239  
N -3.91541039 -1.74774083 -1.62157619  
N -5.70984469 -0.26807055 -1.95767246  
N -3.97917966 -2.27437390 1.22528813  
N -6.15591158 -1.78439075 0.47702121  
N -3.30442842 0.30958798 1.96617140  
N -5.63412493 0.68615840 1.97117299  
N 8.81645461 0.99100885 0.11818204  
N -8.81625220 0.99148510 -0.08861292  
C 1.44714870 -0.59730109 -0.01611476  
C 0.69909056 0.60610270 0.01190596  
H 1.21508811 1.57127796 -0.00021529  
C -0.69852035 0.60587940 0.02074245  
H -1.21456005 1.56990182 0.06912926  
C -1.44645923 -0.59776207 0.00282733  
C -0.70389140 -1.79703168 -0.02390055  
H -1.20396818 -2.77181447 -0.01468082  
C 0.70473827 -1.79680591 -0.03383038  
H 1.20492919 -2.77048995 -0.07935902  
C 2.14788154 0.37706011 -2.66990558  
H 1.27644011 -0.02849158 -2.16008190  
C 2.02308420 0.85072022 -3.96815813  
H 1.04832374 0.80899152 -4.46352389  
C 3.16463399 1.37759882 -4.60533068  
H 3.11098208 1.78865298 -5.62007675  
C 4.36438654 1.35888669 -3.91977005  
H 5.27943016 1.74963631 -4.36886433  
C 4.44111638 0.82929276 -2.59186656  
C 6.81664965 0.87792891 -2.73283201  
C 7.21125538 -0.21864857 -3.52174506  
H 6.58654216 -1.11799068 -3.53258431  
C 8.40080932 -0.15594117 -4.25996988  
H 8.71140890 -1.01762555 -4.86310959  
C 9.19415582 1.00158115 -4.21945654  
H 10.12872534 1.04835229 -4.79073798  
C 8.78894480 2.09604951 -3.43975350  
H 9.40714765 3.00001073 -3.39538830  
C 7.60396120 2.03946939 -2.69592997  
H 7.29263506 2.87818369 -2.07086793  
C 3.14332245 -2.89133282 -2.13927355  
H 2.12242733 -2.50449583 -2.18353667  
C 3.53601232 -4.00076975 -2.87103300  
H 2.81972835 -4.50930657 -3.52304781  
C 4.87397612 -4.44437340 -2.73843315  
H 5.22402246 -5.32373241 -3.29188101  
C 5.75280086 -3.74605028 -1.92872312  
H 6.79959707 -4.04530334 -1.83900668  
C 5.32173800 -2.57039748 -1.23084389  
C 7.37228809 -2.35997191 -0.09742083



C 7.31506244 -3.29080528 0.96084399  
H 6.34057936 -3.55358239 1.38432636  
C 8.49102891 -3.85640073 1.47021740  
H 8.43465799 -4.56699553 2.30378598  
C 9.73510668 -3.50356031 0.92247885  
H 10.65821676 -3.93614055 1.32615914  
C 9.78922416 -2.59579365 -0.14669994  
H 10.75493268 -2.31448388 -0.58211953  
C 8.61608365 -2.02788540 -0.66176629  
H 8.65509391 -1.31585883 -1.48809827  
C 3.28121257 -2.95946225 1.88026310  
H 2.55080561 -3.30634826 1.14941280  
C 3.49855724 -3.65405288 3.05859400  
H 2.94058124 -4.57325811 3.26018662  
C 4.43296937 -3.12770626 3.98227158  
H 4.61396156 -3.62895434 4.94012793  
C 5.13969252 -1.98610024 3.65361225  
H 5.89935952 -1.57747786 4.32308971  
C 4.93453363 -1.34139965 2.39113733  
C 6.65469802 0.23144637 2.86248503  
C 6.24630448 1.31002358 3.66737812  
H 5.21222720 1.66157804 3.61004613  
C 7.16511546 1.92536750 4.52967915  
H 6.84339792 2.77122494 5.14926701  
C 8.48837794 1.46230753 4.59665351  
H 9.20898898 1.94901187 5.26448164  
C 8.88526051 0.37473508 3.80294945  
H 9.91817322 0.01041381 3.84275733  
C 7.97456964 -0.24379764 2.93745390  
H 8.28017289 -1.07710117 2.30180278  
C 2.33733502 0.79386581 2.35128497  
H 1.87163955 -0.18911599 2.44112575  
C 1.98239086 1.83452917 3.20109094  
H 1.24992400 1.66498985 3.99506987  
C 2.55902980 3.10282579 2.97973243  
H 2.27123079 3.96428070 3.59357174  
C 3.53551741 3.23871390 2.00399871  
H 4.06293211 4.18279529 1.84755593  
C 3.94343914 2.09879140 1.24983706  
C 5.69872048 3.29890700 0.11837023  
C 5.08531775 4.08562200 -0.87675313  
H 4.12481795 3.76154275 -1.29231820  
C 5.72131254 5.24470328 -1.34095967  
H 5.24778569 5.84793556 -2.12475279  
C 6.96829089 5.62114458 -0.81573114  
H 7.47154772 6.52157687 -1.18712496  
C 7.57005914 4.83854348 0.18340039  
H 8.54502748 5.12446454 0.59433042  
C 6.94011686 3.67990891 0.65637941  
H 7.40808227 3.05048384 1.41661850  
C -2.33212858 0.87954505 -2.31330275  
H -1.86543366 -0.09914772 -2.43790405  
C -1.97623108 1.95063125 -3.12397569  
H -1.24170107 1.81065647 -3.92176405  
C -2.55458229 3.20958211 -2.85828466  
H -2.26619218 4.09292995 -3.43987958  
C -3.53338785 3.30917049 -1.88053690  
H -4.06202355 4.24652037 -1.69124580  
C -3.94183160 2.14238721 -1.16888021  
C -5.70169732 3.29996000 -0.00103134  
C -6.94233703 3.69678367 -0.52919732  
H -7.40710859 3.09259291 -1.31155337  
C -7.57562889 4.83763836 -0.01897717  
H -8.55004953 5.13560427 -0.42258264  
C -6.97782926 5.58709774 1.00756461  
H -7.48363937 6.47364378 1.40777882



C -5.73158133 5.19521848 1.52315293  
H -5.26121650 5.77239270 2.32818267  
C -5.09234668 4.05350081 1.02181921  
H -4.13242439 3.71707437 1.42882813  
C -3.27547871 -2.88834931 -1.98326512  
H -2.54630564 -3.26130868 -1.26415289  
C -3.49022865 -3.53920158 -3.18676512  
H -2.93145474 -4.45015804 -3.42094575  
C -4.42312037 -2.97955139 -4.09223781  
H -4.60212091 -3.44532093 -5.06820652  
C -5.13092769 -1.85102598 -3.72318548  
H -5.88952455 -1.41830725 -4.37858304  
C -4.92848139 -1.25308540 -2.43745912  
C -6.64909541 0.33488738 -2.85321827  
C -7.96825550 -0.13877541 -2.94815018  
H -8.27377006 -0.99587619 -2.34493282  
C -8.87843015 0.51087958 -3.79109262  
H -9.91080581 0.14703646 -3.84623624  
C -8.48171973 1.62807193 -4.54263634  
H -9.20193240 2.13877000 -5.19273971  
C -7.15909750 2.08977237 -4.45626614  
H -6.83747198 2.95877335 -5.04300188  
C -6.24083130 1.44345220 -3.61633498  
H -5.20731799 1.79391935 -3.54416823  
C -3.14512208 -2.96895500 2.03547237  
H -2.12452683 -2.58356233 2.09562045  
C -3.53841212 -4.10503023 2.72479084  
H -2.82292878 -4.63717272 3.35859078  
C -4.87589909 -4.54404923 2.57348371  
H -5.22637396 -5.44359762 3.09318528  
C -5.75377841 -3.81647362 1.78888962  
H -6.80022563 -4.11276563 1.68631739  
C -5.32217658 -2.61543016 1.13603343  
C -7.37061377 -2.36435896 0.00717050  
C -8.61592464 -2.05406583 0.58054463  
H -8.65733323 -1.37279185 1.43228392  
C -9.78750296 -2.60350834 0.04240298  
H -10.75437255 -2.33903183 0.48572371  
C -9.73035388 -3.47134891 -1.05928427  
H -10.65224431 -3.88943606 -1.48063368  
C -8.48480764 -3.80289270 -1.61691495  
H -8.42605706 -4.48232737 -2.47591175  
C -7.31040229 -3.25563502 -1.08446849  
H -6.33477429 -3.50213961 -1.51502820  
C -2.15302743 0.27843155 2.68925104  
H -1.28048668 -0.10765178 2.16638230  
C -2.03078543 0.70398578 4.00432249  
H -1.05673598 0.64501007 4.49937475  
C -3.17390860 1.20594911 4.65853085  
H -3.12239551 1.57908749 5.68793220  
C -4.37247181 1.21184153 3.97062783  
H -5.28859074 1.58496697 4.43234466  
C -4.44637804 0.73213122 2.62373765  
C -6.82234185 0.77836606 2.76077816  
C -7.60703704 1.94226647 2.76477186  
H -7.29216150 2.80267055 2.17183048  
C -8.79379661 1.97411231 3.50720704  
H -9.40990631 2.88049889 3.49463360  
C -9.20340759 0.85254777 4.24496424  
H -10.13936487 0.88029527 4.81521211  
C -8.41267168 -0.30745236 4.24476188  
H -8.72668683 -1.19005047 4.81499507  
C -7.22130689 -0.34559406 3.50777283  
H -6.59845257 -1.24604983 3.48737195  
C 7.68994531 0.66883606 0.05398317  
C -7.68983159 0.66734613 -0.03343484

**Table S17** xyz coordinates for **2**, S=1, B97D3

Ru 3.44320846 0.11642212 -0.63365898  
Ru 5.73637462 -0.01677395 0.26476695  
Ru -3.44860325 -0.01177076 -0.64155147  
Ru -5.73316246 -0.03019783 0.26313759  
N 3.30283434 1.92562827 0.55107051  
N 5.64897110 1.92137578 0.78709627  
N 3.91916131 1.40386525 -2.12367037  
N 6.08956879 0.56599959 -1.78979168  
N 3.86255403 -1.50904706 -1.81817868  
N 5.68154778 -1.96725231 -0.40391924  
N 3.25934653 -1.38568231 0.94261664  
N 5.11730685 -0.56153581 2.08089953  
N -3.25715779 1.18423147 1.17922494  
N -5.11230561 0.16914367 2.15194664  
N -3.85869303 1.80501781 -1.51570755  
N -5.67327055 2.01209908 -0.03955681  
N -3.92470384 -1.00972189 -2.33975617  
N -6.08830183 -0.22697525 -1.86609578  
N -3.31190133 -2.00722398 0.19894864  
N -5.65715149 -2.03568221 0.42542051  
N 8.82268350 -0.18517914 0.84661476  
N -8.82156223 0.04624298 0.86309785  
C 1.44494542 0.03482465 -0.50963000  
C 0.69566472 -0.07165779 0.69477845  
H 1.21413419 -0.13366821 1.65599724  
C -0.69668759 -0.06794873 0.69714476  
H -1.21255779 -0.17850213 1.65538176  
C -1.44870168 0.04287675 -0.50471334  
C -0.70548775 0.14522609 -1.70410323  
H -1.21043801 0.20593726 -2.67392231  
C 0.69826617 0.14365180 -1.70643391  
H 1.20005027 0.25424808 -2.67352447  
C 2.14139473 2.62483222 0.66864918  
H 1.24698678 2.12517193 0.29878082  
C 2.03377701 3.89541867 1.21772824  
H 1.05185833 4.37494046 1.27552768  
C 3.20570551 4.52551818 1.68536252  
H 3.16966369 5.51956377 2.14655666  
C 4.41014112 3.86229226 1.54914349  
H 5.34575455 4.30651492 1.89483743  
C 4.46608022 2.55826116 0.95539597  
C 6.84105107 2.70197766 0.86238426  
C 7.17464864 3.53249034 -0.22529231  
H 6.49846622 3.57804662 -1.08546560  
C 8.36749698 4.26750484 -0.20540832  
H 8.62776117 4.90261966 -1.06087157  
C 9.22917873 4.18180046 0.89971891  
H 10.16686912 4.74981182 0.91199542  
C 8.88730710 3.36132509 1.98596850  
H 9.55852950 3.28126259 2.84885049  
C 7.69811506 2.62215358 1.97248745  
H 7.43650200 1.96485069 2.80349550  
C 3.08261372 2.30332644 -2.69981910  
H 2.08207564 2.36445848 -2.26145575  
C 3.44883038 3.07920303 -3.78922213  
H 2.73467440 3.78261725 -4.22740210  
C 4.75841656 2.92286339 -4.30530324  
H 5.08378213 3.50697519 -5.17452850  
C 5.64264336 2.05214457 -3.69249953  
H 6.67054191 1.94402999 -4.04638799  
C 5.24449065 1.31260385 -2.52889623  
C 7.28082457 0.13022934 -2.43742158

C 7.19225294 -0.91654656 -3.37918201  
H 6.21000641 -1.34031328 -3.61011071  
C 8.34763590 -1.41486280 -3.99497033  
H 8.26658780 -2.23954861 -4.71360497  
C 9.60267082 -0.86774636 -3.68288910  
H 10.50967739 -1.26291720 -4.15559867  
C 9.68839790 0.19031684 -2.76457752  
H 10.66310106 0.62517264 -2.51472254  
C 8.53628886 0.69375597 -2.14589543  
H 8.59949945 1.51071037 -1.42446950  
C 3.17865439 -1.79250856 -2.95571589  
H 2.44807393 -1.04364894 -3.26528102  
C 3.35217544 -2.95945358 -3.68504436  
H 2.76302910 -3.12951379 -4.59103450  
C 4.28791848 -3.90811694 -3.21055648  
H 4.43694273 -4.85677006 -3.73966066  
C 5.03621114 -3.61983881 -2.08385426  
H 5.79595395 -4.31174014 -1.71429933  
C 4.87281649 -2.36935250 -1.40283956  
C 6.61753597 -2.90505685 0.12878075  
C 6.22759705 -3.72013231 1.20772256  
H 5.20468707 -3.65134731 1.58847340  
C 7.14890581 -4.60509481 1.78548922  
H 6.84064197 -5.23127629 2.63157298  
C 8.45802709 -4.68584605 1.28577685  
H 9.18078034 -5.37180383 1.74328077  
C 8.83790698 -3.88285468 0.19885806  
H 9.86000998 -3.93353342 -0.19386678  
C 7.92461123 -2.99422415 -0.38182275  
H 8.21762742 -2.35016614 -1.21376402  
C 2.35918267 -2.39059223 0.81160984  
H 1.88225714 -2.47157131 -0.16872130  
C 2.01361338 -3.25005511 1.84798103  
H 1.27877604 -4.04243773 1.67991938  
C 2.60479833 -3.03785526 3.11294819  
H 2.32379329 -3.65908201 3.97165678  
C 3.58275424 -2.06455169 3.25134458  
H 4.11859490 -1.91681417 4.19235121  
C 3.98169560 -1.29910902 2.11249099  
C 5.77045713 -0.17587109 3.27700314  
C 5.18355041 0.81181250 4.09440851  
H 4.21251191 1.22932456 3.80647635  
C 5.85760511 1.26761161 5.23483310  
H 5.40313017 2.04568211 5.85990184  
C 7.11810844 0.74312473 5.56453500  
H 7.65079715 1.10841254 6.45042846  
C 7.69545436 -0.24707915 4.75275703  
H 8.68108181 -0.65728381 5.00134198  
C 7.02735612 -0.71179279 3.61229858  
H 7.47709964 -1.46340933 2.95937982  
C -2.35763697 2.19657715 1.22888819  
H -1.88507986 2.45453323 0.27734581  
C -2.00738668 2.85318517 2.40293158  
H -1.27360363 3.66378122 2.37913126  
C -2.59324253 2.41317146 3.61063162  
H -2.30785027 2.86724950 4.56703980  
C -3.57114807 1.43074171 3.57397610  
H -4.10231688 1.11301023 4.47476453  
C -3.97647736 0.88693795 2.31585213  
C -5.76648269 -0.42602779 3.25775387  
C -7.02064182 0.04602577 3.68683163  
H -7.46654382 0.90651887 3.18245394  
C -7.69098530 -0.61520095 4.72425222  
H -8.67469062 -0.25259402 5.04423025  
C -7.11823983 -1.73917688 5.34193198  
H -7.65262127 -2.25713526 6.14703183

C -5.86012965 -2.20057012 4.92133003  
H -5.40931144 -3.08143966 5.39411156  
C -5.18415415 -1.54831309 3.88189477  
H -4.21510912 -1.91097768 3.52202255  
C -3.17173115 2.28479003 -2.58285158  
H -2.44605831 1.59923171 -3.02306819  
C -3.33660780 3.56561495 -3.08960605  
H -2.74615587 3.89240282 -3.95062992  
C -4.26545265 4.41931723 -2.45020702  
H -4.40669629 5.44941064 -2.79827431  
C -5.01661367 3.93741978 -1.39367277  
H -5.77081861 4.55652860 -0.90333984  
C -4.86388936 2.58269957 -0.95118344  
C -6.60900537 2.83925223 0.65234551  
C -7.91082776 3.03055667 0.15599940  
H -8.19788334 2.55737965 -0.78565342  
C -8.82697910 3.79768568 0.88604478  
H -9.84493763 3.92734476 0.50069261  
C -8.45550815 4.37764056 2.10931106  
H -9.18064132 4.96788023 2.68206250  
C -7.15200848 4.19629322 2.59689965  
H -6.85047455 4.64828695 3.54968583  
C -6.22777364 3.43228725 1.87022312  
H -5.20948787 3.28664392 2.24124268  
C -3.09260796 -1.79975438 -3.06340802  
H -2.09481433 -1.94672997 -2.63925001  
C -3.45971380 -2.36536274 -4.27520689  
H -2.74924023 -2.98543169 -4.82975300  
C -4.76545879 -2.10734405 -4.75933519  
H -5.09133732 -2.52393299 -5.72002606  
C -5.64590685 -1.35252019 -4.00381674  
H -6.67118301 -1.17398251 -4.33623120  
C -5.24755946 -0.83658246 -2.72539876  
C -7.27000861 0.33573530 -2.42660516  
C -8.53554653 -0.24940880 -2.23949496  
H -8.61436975 -1.18015160 -1.67440633  
C -9.67766650 0.37489117 -2.75874381  
H -10.66004575 -0.08113455 -2.58961938  
C -9.57220899 1.57713449 -3.47540866  
H -10.47140269 2.06491058 -3.87016884  
C -8.30732497 2.14941845 -3.68671597  
H -8.21067853 3.08674204 -4.24815616  
C -7.16207640 1.53079020 -3.16917659  
H -6.17240334 1.97211933 -3.32216093  
C -2.15231749 -2.71844371 0.19151228  
H -1.25513613 -2.16025464 -0.07323589  
C -2.04998626 -4.06970883 0.49341021  
H -1.06924146 -4.55442450 0.46726058  
C -3.22687525 -4.77309599 0.82462846  
H -3.19598650 -5.83688612 1.08847704  
C -4.42935889 -4.09272600 0.80966897  
H -5.36779854 -4.59222085 1.05877895  
C -4.47928344 -2.69919927 0.47414170  
C -6.85610876 -2.80675056 0.36019323  
C -7.69929174 -2.94213944 1.47579227  
H -7.42051641 -2.46575634 2.41735598  
C -8.89633656 -3.65911060 1.35851117  
H -9.55673908 -3.74643291 2.22904184  
C -9.25957695 -4.24484616 0.13581104  
H -10.20334605 -4.79587953 0.04776063  
C -8.41140710 -4.11734671 -0.97560634  
H -8.68826438 -4.56834348 -1.93629471  
C -7.21104154 -3.40270469 -0.86549728  
H -6.54546478 -3.28246964 -1.72662896  
C 7.68223440 -0.10014810 0.55810949  
C -7.68113223 0.00801258 0.56463893

**Table S18** xyz coordinates for **3**, S=0, B97D3

Ru -1.72273300 -0.19533400 -0.18688200  
Ru 0.74668300 0.12833600 0.08145300  
N -1.49157900 -2.14079300 0.37195900  
N 0.61638300 -1.56359200 1.24059400  
N -1.50923500 0.18685400 1.93670600  
N 0.52379300 1.30061200 1.66399500  
N -1.67218700 1.80168700 -0.99266800  
N 0.68118500 1.69870700 -1.13915000  
N -1.63000400 -0.70319700 -2.14135200  
N 0.61585900 -1.19748700 -1.63359300  
N 3.88897100 0.07537100 0.09078000  
C -3.64645500 0.20776400 0.29482700  
C -4.64125300 -0.59214800 -0.29058800  
H -4.38372700 -1.39180500 -0.97780800  
C -5.99821600 -0.36872000 -0.03306800  
H -6.74014100 -1.00908100 -0.50756300  
C -6.39855300 0.66181200 0.81819200  
H -7.45326000 0.83347800 1.01990900  
C -5.42131000 1.47410000 1.39891300  
H -5.71095100 2.29327100 2.05528800  
C -4.06893000 1.24985200 1.14418000  
H -3.33624500 1.91588200 1.58981900  
C -2.38070800 -3.11394600 0.04721200  
H -3.18867800 -2.80942600 -0.61705700  
C -2.30693300 -4.41116700 0.52810700  
H -3.06318800 -5.14430500 0.23360500  
C -1.25667500 -4.73508600 1.41792300  
H -1.18273700 -5.73760700 1.85376700  
C -0.30323300 -3.77758000 1.71479400  
H 0.54120100 -4.01063900 2.36593300  
C -0.37480700 -2.47362800 1.12979800  
C 1.72016600 -1.88001800 2.09351300  
C 1.74262300 -1.36460200 3.40143000  
H 0.90039000 -0.76592400 3.75821900  
C 2.84167400 -1.61930800 4.23561400  
H 2.85500900 -1.20896200 5.25237900  
C 3.91566700 -2.39670000 3.77324600  
H 4.77500200 -2.59285400 4.42512900  
C 3.88074900 -2.92402900 2.47158400  
H 4.71390900 -3.53336000 2.10154300  
C 2.78941900 -2.66766000 1.63163300  
H 2.75906300 -3.05893800 0.61237200  
C -2.38413600 -0.38610900 2.79964400  
H -3.06488800 -1.11748200 2.36291400  
C -2.45041000 -0.06910100 4.15092600  
H -3.17135800 -0.58052200 4.79498800  
C -1.59614100 0.93978600 4.64284100  
H -1.64522200 1.25493900 5.69121800  
C -0.65282700 1.49770200 3.79139700  
H 0.07761900 2.22707600 4.14942000  
C -0.55644000 1.03713800 2.44577500  
C 1.36472100 2.39983900 1.96776600  
C 0.88156500 3.70691500 1.75610100  
H -0.14470500 3.84204300 1.39804900  
C 1.72175900 4.80725200 1.97533300  
H 1.34611000 5.82155800 1.79641800  
C 3.04373700 4.60917400 2.40791500  
H 3.70370700 5.46908700 2.57070800  
C 3.51634200 3.30482100 2.63187900  
H 4.54511000 3.14553000 2.97563100  
C 2.68167300 2.19961000 2.41653500  
H 3.03714400 1.17877200 2.57375200

C -2.81286100 2.43078900 -1.38615200  
H -3.74250300 1.94757600 -1.09608000  
C -2.85792400 3.61370300 -2.11028300  
H -3.82798900 4.04909700 -2.36782400  
C -1.64193300 4.21774500 -2.48760500  
H -1.62448900 5.16398100 -3.03983600  
C -0.46212000 3.57966400 -2.15239800  
H 0.50411500 4.00355000 -2.43112700  
C -0.47618600 2.34889400 -1.42197500  
C 1.85286300 2.10198800 -1.85198500  
C 2.04714500 1.61361400 -3.15701800  
H 1.28701000 0.96162700 -3.59883800  
C 3.21067900 1.94919600 -3.86386000  
H 3.36278600 1.55591000 -4.87606000  
C 4.17657500 2.78350800 -3.27721900  
H 5.08663700 3.04527600 -3.82958400  
C 3.96898500 3.28250500 -1.98062800  
H 4.71625200 3.93719000 -1.51661400  
C 2.81232600 2.94344000 -1.26568800  
H 2.64776600 3.31719600 -0.25337600  
C -2.62754300 -0.55656700 -3.04659100  
H -3.53272500 -0.07163900 -2.67471700  
C -2.52952600 -1.00960200 -4.35295100  
H -3.36854100 -0.87867300 -5.04223100  
C -1.32641800 -1.64041100 -4.74938000  
H -1.20824300 -2.01687400 -5.77191600  
C -0.28163300 -1.75452000 -3.84712100  
H 0.67018600 -2.20180000 -4.14250300  
C -0.40689100 -1.23324400 -2.51919400  
C 1.63681200 -2.16781600 -1.83746100  
C 1.33834900 -3.52449700 -1.58618700  
H 0.32664100 -3.79441800 -1.26764300  
C 2.32646300 -4.50776800 -1.72794500  
H 2.08386300 -5.55545100 -1.51315400  
C 3.62353500 -4.14928500 -2.13202500  
H 4.40086600 -4.91518000 -2.23711800  
C 3.91449800 -2.80317300 -2.40801900  
H 4.92033900 -2.51564900 -2.73691400  
C 2.92880700 -1.81580800 -2.26716400  
H 3.14809600 -0.76846000 -2.48144200  
C 2.71703700 0.05781300 0.04147900

**Table S19** xyz coordinates for **3**, S=1

Ru -1.64462900 -0.24946900 -0.22647500  
Ru 0.71153900 0.13202500 0.10705500  
N -1.33097200 -2.23912500 0.27994500  
N 0.69041300 -1.58688800 1.26433800  
N -1.50576300 0.04156800 1.94440900  
N 0.39759400 1.33430800 1.69501000  
N -1.73025900 1.80897500 -0.90259100  
N 0.60368600 1.74896200 -1.11900200  
N -1.50620400 -0.64655200 -2.21082300  
N 0.69472600 -1.19311300 -1.63987500  
N 3.88074700 0.21863500 0.14512500  
C -3.61459600 -0.02986800 0.27117300  
C -4.51079200 -0.81344200 -0.47067000  
H -4.15645500 -1.51073700 -1.22298400  
C -5.89335400 -0.69765200 -0.28798300  
H -6.56250800 -1.31937600 -0.87978500  
C -6.40699300 0.20721400 0.63990000  
H -7.48108300 0.29647600 0.78449200  
C -5.52518000 1.00710400 1.37297200  
H -5.91037300 1.73231100 2.08735700  
C -4.14886100 0.88985400 1.19282500  
H -3.48975300 1.54548500 1.75194300  
C -2.18290200 -3.22471000 -0.08499000  
H -2.97798300 -2.93364700 -0.77071400  
C -2.08693200 -4.53200500 0.37274100  
H -2.80976600 -5.28107200 0.03803200  
C -1.05488800 -4.83877700 1.28651300  
H -0.96178100 -5.84702900 1.70576600  
C -0.14002100 -3.85842300 1.63364100  
H 0.68812300 -4.07734000 2.31043200  
C -0.23392900 -2.54635500 1.07356200  
C 1.79368600 -1.84458500 2.12950500  
C 1.82488000 -1.25761500 3.40689900  
H 0.97920400 -0.65051500 3.74004500  
C 2.93840900 -1.44883500 4.23909300  
H 2.95864000 -0.98201100 5.23113400  
C 4.01900800 -2.23410500 3.80669800  
H 4.88937200 -2.38003600 4.45718300  
C 3.97789200 -2.83307900 2.53611200  
H 4.81765400 -3.44707100 2.18921000  
C 2.87301300 -2.63844800 1.69767100  
H 2.83993900 -3.08020600 0.69828000  
C -2.32202400 -0.63731300 2.78117300  
H -2.90887800 -1.43611700 2.32475400  
C -2.45444500 -0.33111400 4.13025100  
H -3.12547900 -0.91991600 4.76179300  
C -1.73384800 0.77492100 4.63370300  
H -1.84846800 1.08618700 5.67845600  
C -0.83974600 1.43997800 3.80665300  
H -0.21372600 2.25542600 4.17755700  
C -0.65340600 0.98271100 2.46747900  
C 1.13074300 2.51270200 1.96126800  
C 0.52475600 3.76969300 1.75881900  
H -0.51897200 3.80778900 1.42897700  
C 1.26468200 4.94459800 1.94926200  
H 0.79179600 5.91844900 1.77541300  
C 2.61172800 4.87411700 2.34354800  
H 3.19323300 5.79292900 2.48217900  
C 3.20994100 3.62078700 2.55812200  
H 4.25906800 3.55986000 2.87066000  
C 2.47469100 2.44207800 2.37184000  
H 2.92907200 1.45981800 2.52292700

C -2.89735700 2.43894000 -1.18832100  
H -3.80385900 1.92445700 -0.87717200  
C -2.99584800 3.66004000 -1.84312700  
H -3.98185100 4.09895900 -2.02056400  
C -1.80640300 4.28919200 -2.26174000  
H -1.82918300 5.25764400 -2.77444600  
C -0.59932100 3.65888900 -2.01620800  
H 0.34472100 4.11239800 -2.32378100  
C -0.55676400 2.39960500 -1.33740500  
C 1.76896600 2.18969700 -1.81440600  
C 2.04471400 1.66026600 -3.08798900  
H 1.34679000 0.94061600 -3.52630000  
C 3.21095100 2.04090400 -3.76765400  
H 3.42723300 1.61507100 -4.75475700  
C 4.09856800 2.96099200 -3.18580400  
H 5.01166200 3.25583600 -3.71618300  
C 3.80851300 3.50459300 -1.92311200  
H 4.49354000 4.22772800 -1.46451400  
C 2.64817000 3.12191000 -1.23683200  
H 2.41917100 3.52936300 -0.24996300  
C -2.46235500 -0.41855000 -3.14223300  
H -3.36201300 0.08750300 -2.78418900  
C -2.33200800 -0.82607700 -4.46117300  
H -3.13842300 -0.63750000 -5.17530100  
C -1.14055500 -1.49346500 -4.83454200  
H -1.00249900 -1.84357700 -5.86409200  
C -0.13054400 -1.67679600 -3.90377700  
H 0.81368800 -2.15179500 -4.18057600  
C -0.28330300 -1.19044900 -2.56561300  
C 1.72780000 -2.15368900 -1.81439900  
C 1.43526000 -3.51710800 -1.59529800  
H 0.41364600 -3.80480500 -1.32990700  
C 2.44062800 -4.48705000 -1.70453700  
H 2.20106200 -5.54005000 -1.51336600  
C 3.75021300 -4.10939600 -2.04578900  
H 4.54067800 -4.86507900 -2.12362000  
C 4.03625200 -2.75742700 -2.29703500  
H 5.05135800 -2.45498200 -2.58120000  
C 3.03262100 -1.78402700 -2.18943500  
H 3.24781300 -0.73280400 -2.38894700  
C 2.71425500 0.14815900 0.06607300



**Table S20** xyz coordinates for [2]<sup>+</sup>, S=1/2, B97D3, gas phase.

Ru 3.44794274 -0.66110362 -0.11341936  
Ru 5.72304544 0.28386730 0.01099542  
Ru -3.44793672 -0.67186861 0.03498465  
Ru -5.72226093 0.28220690 0.02508171  
N 3.30083994 0.49115464 -1.93630536  
N 5.63996869 0.78460461 -1.91638996  
N 3.94952437 -2.15669043 -1.37727054  
N 6.11761883 -1.76110523 -0.56154971  
N 3.89516230 -1.82381371 1.51360120  
N 5.69369060 -0.38081078 1.94910878  
N 3.24082121 0.92410776 1.37273129  
N 5.08321932 2.08142054 0.54273605  
N -3.23870385 1.08352486 -1.24525196  
N -5.08243444 2.13130929 -0.28315654  
N -3.89216740 -1.62627680 -1.72234912  
N -5.69017935 -0.14054854 -1.98032497  
N -3.95082964 -2.31202128 1.10379990  
N -6.11845462 -1.81712371 0.34210521  
N -3.30307138 0.24643045 1.98658019  
N -5.64178789 0.54308359 1.99921371  
N 8.79823355 0.91952637 0.20142031  
N -8.79739523 0.93577972 -0.08894041  
C 1.44488358 -0.55400121 -0.03640369  
C 0.69569410 0.65235733 0.04139373  
H 1.21339337 1.61541562 0.07359518  
C -0.69633323 0.65143106 0.04873276  
H -1.21446999 1.61071987 0.13740944  
C -1.44458443 -0.55569991 -0.02505734  
C -0.70149611 -1.75634977 -0.10299756  
H -1.20344980 -2.72865157 -0.13827688  
C 0.70269551 -1.75561029 -0.10773776  
H 1.20539041 -2.72442803 -0.19321060  
C 2.14617561 0.56229242 -2.65133016  
H 1.25888200 0.17232684 -2.15745983  
C 2.04058500 1.08712982 -3.93122313  
H 1.06446213 1.10661022 -4.42493488  
C 3.20321183 1.58073654 -4.55657650  
H 3.16530034 2.02552470 -5.55721880  
C 4.40290957 1.48612189 -3.87699993  
H 5.33328777 1.85166681 -4.31544331  
C 4.45761042 0.91366436 -2.56704307  
C 6.83609411 0.88904287 -2.69614110  
C 7.18937782 -0.19136225 -3.52567873  
H 6.53092823 -1.06492071 -3.57587981  
C 8.38419866 -0.14539464 -4.25661163  
H 8.66456470 -0.99304960 -4.89275727  
C 9.22035242 0.97868518 -4.16744691  
H 10.15771012 1.01228970 -4.73423294  
C 8.85376033 2.05823938 -3.34863192  
H 9.50428909 2.93646714 -3.27115938  
C 7.66416575 2.01876574 -2.61094759  
H 7.38102020 2.84578132 -1.95752194  
C 3.11612586 -2.77072744 -2.25221300  
H 2.10477891 -2.36094186 -2.30460679  
C 3.50308075 -3.85745466 -3.01885700  
H 2.79155460 -4.32550057 -3.70512657  
C 4.83013403 -4.33151383 -2.88091956  
H 5.17332084 -5.19444392 -3.46287430  
C 5.70719288 -3.68164392 -2.03060596  
H 6.74700447 -4.00229860 -1.93625576  
C 5.28389929 -2.52729700 -1.29444764  
C 7.32714075 -2.39063289 -0.13422032  
C 7.25024426 -3.35372012 0.89253094

H 6.27108727 -3.61442814 1.30656904  
C 8.41581864 -3.95860743 1.38069496  
H 8.34747185 -4.69704997 2.18824238  
C 9.66525423 -3.61232605 0.84151717  
H 10.57954906 -4.07758427 1.22729650  
C 9.73683894 -2.67338102 -0.19916072  
H 10.70701537 -2.40226775 -0.63025914  
C 8.57440057 -2.06597655 -0.69321020  
H 8.62618337 -1.33553100 -1.50274259  
C 3.23224460 -2.97006625 1.80619706  
H 2.50270437 -3.29331391 1.06433972  
C 3.43318232 -3.69402750 2.97064131  
H 2.86295679 -4.61070745 3.14683827  
C 4.37003934 -3.20522136 3.90996370  
H 4.53799653 -3.73099104 4.85650543  
C 5.09722523 -2.06758281 3.60998047  
H 5.85873580 -1.68480163 4.29225077  
C 4.90662582 -1.39337996 2.36315549  
C 6.65526588 0.14501263 2.87471398  
C 6.30192529 1.26072704 3.65267763  
H 5.29363731 1.67660314 3.57390934  
C 7.24453915 1.82910338 4.52177378  
H 6.96803853 2.70187768 5.12492105  
C 8.53387417 1.28351399 4.61781477  
H 9.27259312 1.73368842 5.29068322  
C 8.87415530 0.15980725 3.84869704  
H 9.88064747 -0.26840147 3.91316626  
C 7.93947916 -0.41392238 2.97807774  
H 8.20212962 -1.27423717 2.35871941  
C 2.34451795 0.78757128 2.37890337  
H 1.87937158 -0.19652504 2.46388974  
C 1.99638735 1.82128077 3.23886052  
H 1.27213922 1.64594388 4.03913524  
C 2.57551319 3.09124549 3.02727362  
H 2.29433339 3.94591309 3.65293998  
C 3.54749592 3.23563239 2.04872231  
H 4.07811250 4.17923889 1.90028467  
C 3.94715426 2.10148965 1.28155715  
C 5.72437526 3.29316752 0.17087755  
C 5.13044607 4.09800225 -0.82097627  
H 4.16875761 3.79419820 -1.24900034  
C 5.78861653 5.25226108 -1.26590282  
H 5.33235467 5.87216140 -2.04642041  
C 7.03477847 5.60447560 -0.72257456  
H 7.55366428 6.50228190 -1.07724434  
C 7.61535688 4.80369945 0.27458891  
H 8.58792423 5.07387204 0.70075127  
C 6.96496142 3.64795286 0.72696454  
H 7.41519971 3.00630721 1.48785553  
C -2.34094899 1.07064461 -2.25932593  
H -1.87607725 0.10407511 -2.46348668  
C -1.99176565 2.20146541 -2.98633476  
H -1.26663461 2.12505486 -3.80116679  
C -2.57114143 3.43626813 -2.62227814  
H -2.28896423 4.36079952 -3.13859923  
C -3.54459189 3.46034741 -1.63494083  
H -4.07557795 4.37883513 -1.37342256  
C -3.94534201 2.24111656 -1.01243821  
C -5.72607424 3.28928701 0.22943590  
C -6.96500227 3.70736301 -0.28479330  
H -7.41183488 3.16108767 -1.11861822  
C -7.61833577 4.80015431 0.30022496  
H -8.58972449 5.11862747 -0.09406192  
C -7.04217319 5.47628125 1.38812274  
H -7.56324625 6.32489248 1.84576314  
C -5.79759508 5.06236898 1.88998673

H -5.34479552 5.58469660 2.74075355  
C -5.13661207 3.96994490 1.31268583  
H -4.17620916 3.61772653 1.70499922  
C -3.22987178 -2.72907989 -2.15142330  
H -2.50164522 -3.14076977 -1.45343205  
C -3.42994115 -3.30583398 -3.39547812  
H -2.86020172 -4.19477719 -3.68125580  
C -4.36543067 -2.70560478 -4.26935524  
H -4.53266390 -3.11216633 -5.27301208  
C -5.09229747 -1.61243458 -3.83388345  
H -5.85314991 -1.14910915 -4.46504757  
C -4.90277792 -1.09515893 -2.51403802  
C -6.64996215 0.49524657 -2.83614380  
C -7.93533586 -0.04415683 -3.00686973  
H -8.20020384 -0.97262378 -2.49647943  
C -8.86821492 0.63285302 -3.80199504  
H -9.87562362 0.21789917 -3.91810973  
C -8.52495123 1.84051865 -4.42950943  
H -9.26225824 2.37043002 -5.04325820  
C -7.23443414 2.36745846 -4.26782800  
H -6.95557217 3.30612771 -4.76089177  
C -6.29368219 1.69601487 -3.47347977  
H -5.28465421 2.09724555 -3.34450175  
C -3.11794476 -3.03043004 1.89571537  
H -2.10640353 -2.63079985 1.99846592  
C -3.50568046 -4.20376903 2.52135846  
H -2.79458409 -4.75395382 3.14420132  
C -4.83301711 -4.65603700 2.32546296  
H -5.17695257 -5.58425934 2.79579168  
C -5.70948982 -3.90509482 1.56223407  
H -6.74943731 -4.21104200 1.42875919  
C -5.28534240 -2.66871226 0.97491317  
C -7.32737719 -2.38892032 -0.16151472  
C -8.57584650 -2.13305123 0.42960174  
H -8.62926191 -1.50553504 1.32116931  
C -9.73751470 -2.67515623 -0.13693333  
H -10.70850675 -2.45727822 0.32164460  
C -9.66410057 -3.48141967 -1.28334758  
H -10.57775594 -3.89584753 -1.72460755  
C -8.41357503 -3.76103784 -1.85756984  
H -8.34373629 -4.39639051 -2.74838587  
C -7.24878013 -3.22083635 -1.29707933  
H -6.26893770 -3.43124435 -1.73719085  
C -2.14947655 0.22752005 2.70654783  
H -1.26193089 -0.09975166 2.16952376  
C -2.04525178 0.59048930 4.04150359  
H -1.06966435 0.54847615 4.53496007  
C -3.20859142 1.00373944 4.72144431  
H -3.17193534 1.32128207 5.76948402  
C -4.40741004 0.99468793 4.03380762  
H -5.33823166 1.30348659 4.51306347  
C -4.46051750 0.58907450 2.66287043  
C -6.83960943 0.55432824 2.78346968  
C -7.66299362 1.68935148 2.83835038  
H -7.37481740 2.59039799 2.29417270  
C -8.85440365 1.64141998 3.57256191  
H -9.50121272 2.52523922 3.60400504  
C -9.22752235 0.46959675 4.24920570  
H -10.16625480 0.43609563 4.81371643  
C -8.39616002 -0.66040706 4.19885520  
H -8.68165036 -1.57974633 4.72336702  
C -7.19956929 -0.61979973 3.47046311  
H -6.54509838 -1.49581897 3.41218702  
C 7.67058451 0.61335099 0.10718640  
C -7.66957394 0.62111848 -0.03213519

## 12. References

- 1 G. Zou, J. C. Alvarez and T. Ren, *J. Organomet. Chem.*, 2000, **596**, 152-158.
- 2 A. Raghavan, B. L. Mash and T. Ren, *Inorg. Chem.*, 2019, **58**, 2618-2626.
- 3 A. Raghavan, F. Yuan and T. Ren, *Inorg. Chem.*, 2020, **59**, 8663-8666.
- 4 A. B. Pangborn, M. A. Giardello, R. H. Grubbs and R. K. Rosen, *Organometallics*, 1996, **15**, 1518-1520.
- 5 D. F. Evans, *J. Chem. Soc.*, 1959, **0**, 2003-2005.
- 6 J. Krekicik, H. Danek and F. Hartl, *J. Electroanal. Chem.*, 1991, **317**, 179-187.
- 7 Bruker (2019). *Apex3 v2019.1-0, Saint V8.40A, Bruker AXS Inc.: Madison (WI), USA.*
- 8 L. Krause, R. Herbst-Irmer, S. G.M. and S. D., *J. Appl. Cryst.*, 2015, **48**, 3-10.
- 9 *SHELXTL, version 6.14; Bruker Advanced X-ray Solutions, Bruker AXS Inc.: Madison, WI, 2000-2003.*
- 10 G. M. Sheldrick, *Acta Cryst.*, 2008, **64**, 112-122.
- 11 G. M. Sheldrick, *Acta Cryst.*, 2015, **A71**, 3-8.
- 12 G. M. Sheldrick, 2016.
- 13 G. M. Sheldrick, *Acta Cryst. C*, 2015, **71**, 3-8.
- 14 C. B. Hubschle, G. M. Sheldrick and B. Dittrich, *J. Appl. Cryst.*, 2011, **44**, 1281-1284.
- 15 G. L. Xu, G. Zou, Y. H. Ni, M. C. DeRosa, R. J. Crutchley and T. Ren, *J. Am. Chem. Soc.*, 2003, **125**, 10057-10065.
- 16 *R. A. Gaussian 16*, Frisch, M. J.; Trucks, G. W.; Schlegel, H. B.; Scuseria, G. E.; Robb, M. A.; Cheeseman, J. R.; Scalmani, G.; Barone, V.; Petersson, G. A.; Nakatsuji, H.; Li, X.; Caricato, M.; Marenich, A. V.; Bloino, J.; Janesko, B. G.; Gomperts, R.; Mennucci, B.; Hratchian, H. P.; Ortiz, J. V.; Izmaylov, A. F.; Sonnenberg, J. L.; Williams-Young, D.; Ding, F.; Lipparini, F.; Egidi, F.; Goings, J.; Peng, B.; Petrone, A.; Henderson, T.; Ranasinghe, D.; Zakrzewski, V. G.; Gao, J.; Rega, N.; Zheng, G.; Liang, W.; Hada, M.; Ehara, M.; Toyota, K.; Fukuda, R.; Hasegawa, J.; Ishida, M.; Nakajima, T.; Honda, Y.; Kitao, O.; Nakai, H.; Vreven, T.; Throssell, K.; Montgomery, J. A., Jr.; Peralta, J. E.; Ogliaro, F.; Bearpark, M. J.; Heyd, J. J.; Brothers, E. N.; Kudin, K. N.; Staroverov, V. N.; Keith, T. A.; Kobayashi, R.; Normand, J.; Raghavachari, K.; Rendell, A. P.; Burant, J. C.; Iyengar, S. S.; Tomasi, J.; Cossi, M.; Millam, J. M.; Klene, M.; Adamo, C.; Cammi, R.; Ochterski, J. W.; Martin, R. L.; Morokuma, K.; Farkas, O.; Foresman, J. B.; Fox, D. J. *Gaussian, Inc., Wallingford CT, 2016.*
- 17 S. Grimme, *J. Comp. Chem.*, 2006, **27**, 1787-1799.
- 18 S. Grimme, S. Ehrlick and L. Goerigk, *J. Comp. Chem.*, 2011, **32**, 1456-1465.
- 19 A. D. Becke, *J. Chem. Phys.*, 1993, **98**, 5648-5652.
- 20 C. Lee, W. Yang and R. G. Parr, *Phys. Rev. B*, 1988, **37**, 785-789.
- 21 S. H. Vosko, L. Wilk and M. Nusair, *Can. J. Phys.*, 1980, **58**, 1200-1211.
- 22 P. J. Stephens, F. J. Devlin, C. F. Chabalowski and M. J. Frisch, *J. Phys. Chem.*, 1994, **98**, 11623-11627.
- 23 F. Weigend and R. Ahlrichs, *Phys. Chem. Chem. Phys.*, 2005, **7**, 3297-3305.
- 24 F. Weigend, *Phys. Chem. Chem. Phys.*, 2006, **8**, 1057-1065.
- 25 M. E. Casida, C. Jamorski, K. C. Casida and D. R. Salahub, *J. Chem. Phys.*, 1998, **108**, 4439-4449.
- 26 F. Furche and R. Ahlrichs, *J. Chem. Phys.*, 2002, **117**, 7433-7447.

- 27 J. Liu and W. Liang, *J. Chem. Phys.*, 2001, **135**, 184111.
- 28 G. Scalmani, M. J. Frisch, B. Mennucci, J. Tomasi, R. Cammi and V. Barone, *J. Chem. Phys.*, 2006, **124**, 1-15.
- 29 R. E. Stratmann, G. E. Scuseria and M. J. Frisch, *J. Chem. Phys.*, 1998, **109**, 8218-8224.
- 30 M. Caricato, F. Ingrosso, B. Mennucci and J. Tomasi, *J. Chem. Phys.*, 2005, **122**, 1-10.
- 31 T. Yanai, D. Tew and N. Handy, *Chem. Phys. Lett.*, 2004, **393**, 51-57.
- 32 Y. Zhao and D. G. Truhlar, *Theor. Chem. Acc.*, 2008, **120**, 215-241.
- 33 Y. Zhao and D. G. Truhlar, *J. Chem. Phys.*, 2006, **125**, 1-18.
- 34 R. L. Martin, *J. Chem. Phys.*, 2003, **118**, 4775-4777.
